# Supplementary material for: Physico-geometrical kinetic insight into multistep thermal dehydration of calcium hydrogen phosphate dihydrate
Source: Royal Society of Chemistry journal article supplement (doi:10.1039/d3cp01323e), 2023-01-01
Supplement: d3cp01323e1.pdf [file d3cp01323e1.pdf]

# Physico-geometrical kinetic insight into multistep thermal dehydration of calcium hydrogen phosphate dihydrate

Masami Hara and Nobuyoshi Koga\*

Chemistry Laboratory, Department of Science Education, Graduate School of Humanities and Social Sciences, 1-1-1 Kagamiyama, Higashi-Hiroshima 739-8524, Japan

## Contents

|                                                                                                                                                                                                                                                                                                                                                                                                                        |            |
|------------------------------------------------------------------------------------------------------------------------------------------------------------------------------------------------------------------------------------------------------------------------------------------------------------------------------------------------------------------------------------------------------------------------|------------|
| <b>S1. Sample Characterization</b> .....                                                                                                                                                                                                                                                                                                                                                                               | <b>s4</b>  |
| <b>Figure S1.</b> Appearances of sample particles in different particle size fractions: (a) 20–45, (b) 63–75, and (c) 90–150 $\mu\text{m}$ . .....                                                                                                                                                                                                                                                                     | s4         |
| <b>Figure S2.</b> XRD pattern of DCPD. ....                                                                                                                                                                                                                                                                                                                                                                            | s4         |
| <b>Figure S3.</b> FTIR spectra of DCPD. ....                                                                                                                                                                                                                                                                                                                                                                           | s4         |
| <b>Table S1.</b> Assignments of the IR absorption peaks of DCPD. ....                                                                                                                                                                                                                                                                                                                                                  | s5         |
| <b>Figure S4.</b> Change in the FTIR spectrum accompanied by the thermal dehydration of DCPD by heating to different temperatures at a $\beta$ of 5 K $\text{min}^{-1}$ in a stream of dry $\text{N}_2$ : (a) FTIR spectrum at different temperatures, (b) FTIR spectra at 573 K, and (c) FTIR spectra at 873 K. ....                                                                                                  | s5         |
| <b>Table S2.</b> Assignments of the IR absorption peaks of DCPA. ....                                                                                                                                                                                                                                                                                                                                                  | s5         |
| <b>Table S3.</b> Assignments of the IR absorption peaks of $\gamma$ -CPP. ....                                                                                                                                                                                                                                                                                                                                         | s5         |
| <b>S2. Multistep Thermal Dehydration of DCPD in a Stream of Dry <math>\text{N}_2</math></b> .....                                                                                                                                                                                                                                                                                                                      | <b>s6</b>  |
| <b>Figure S5.</b> TG–DTG–DTA curves for the thermal dehydration of DCPD ( $m_0 = 5.00 \pm 0.03$ mg) with different particle sizes recorded at a $\beta$ of 5 K $\text{min}^{-1}$ in a stream of dry $\text{N}_2$ ( $q_v = 300$ $\text{cm}^3$ $\text{min}^{-1}$ ): (a) overall view and (b) focused on the first mass loss step. ....                                                                                   | s6         |
| <b>Figure S6.</b> TG–DTG–DTA curves for the thermal dehydration of DCPD (63–75 $\mu\text{m}$ ) with different $m_0$ values at a $\beta$ of 5 K $\text{min}^{-1}$ in a stream of dry $\text{N}_2$ ( $q_v = 300$ $\text{cm}^3$ $\text{min}^{-1}$ ). ....                                                                                                                                                                 | s6         |
| <b>Figure S7.</b> TG–DTG–DTA curves for the thermal dehydration of DCPD (63–75 $\mu\text{m}$ ; $m_0 = 5.00 \pm 0.03$ mg) at a $\beta$ of 5 K $\text{min}^{-1}$ in a stream of dry $\text{N}_2$ at different $q_v$ values. ....                                                                                                                                                                                         | s6         |
| <b>S3. Mathematical Deconvolution Analysis for the Thermal Dehydration in a Stream of Dry <math>\text{N}_2</math></b> .....                                                                                                                                                                                                                                                                                            | <b>s7</b>  |
| <b>Figure S8.</b> Result of MDA for the multistep thermal dehydration of DCPD (63–75 $\mu\text{m}$ ) in a stream of dry $\text{N}_2$ : (a) typical fitting results for the overall reaction under linear nonisothermal conditions at a $\beta$ of 5 K $\text{min}^{-1}$ and (b) contributions of individual steps at various $\beta$ values. ....                                                                      | s7         |
| <b>Figure S9.</b> Kinetic curves for each reaction step of the multistep thermal dehydration of DCPD (63–75 $\mu\text{m}$ ) in a stream of dry $\text{N}_2$ : (a) first, (b) second, (c) third, (d) fourth, and (e) fifth steps. ....                                                                                                                                                                                  | s8         |
| <b>Figure S10.</b> Friedman plots for each step of the multistep thermal dehydration of DCPD (63–75 $\mu\text{m}$ ) in a stream of dry $\text{N}_2$ : (a) first, (b) second, (c) third, (d) fourth, and (e) fifth steps. ....                                                                                                                                                                                          | s8         |
| <b>Figure S11.</b> $E_{a,i}$ values at various $\alpha_i$ values determined by the Friedman plots applied to the mathematically separated kinetic curves: (a) first, (b) second, (c) third, (d) fourth, and (e) fifth steps. ....                                                                                                                                                                                      | s9         |
| <b>Figure S12.</b> Experimental master plots for each step of the multistep thermal dehydration of DCPD (63–75 $\mu\text{m}$ ) in a stream of dry $\text{N}_2$ : (a) first, (b) second, (c) third, (d) fourth, and (e) fifth steps. ....                                                                                                                                                                               | s9         |
| <b>Table S4.</b> Results of mathematical deconvolution analysis and subsequent formal kinetic analysis for the multistep thermal dehydration of DCPD (63–75 $\mu\text{m}$ ) in a stream of dry $\text{N}_2$ .....                                                                                                                                                                                                      | s9         |
| <b>S4. Kinetic Analysis for the Thermal Dehydration in a Stream of <math>\text{N}_2</math>–<math>\text{H}_2\text{O}</math> mixed gas</b> .....                                                                                                                                                                                                                                                                         | <b>s10</b> |
| <b>Figure S13.</b> TG–DTG–DTA curves for the thermal dehydration of DCPD (63–75 $\mu\text{m}$ ; $m_0 = 5.03 \pm 0.07$ mg) recorded at different $\beta$ values in a stream of $\text{N}_2$ – $\text{H}_2\text{O}$ mixed gas ( $q_v = 200$ $\text{cm}^3$ $\text{min}^{-1}$ ) with different $p(\text{H}_2\text{O})$ values: (a) 1.2 kPa, (b) 2.9 kPa, (c) 6.3 kPa, (d) 8.1 kPa, (e) 10.2 kPa, and (f) 15.8 kPa. ....    | s10        |
| <b>Figure S14.</b> Result of MDA for the multistep thermal dehydration of DCPD (63–75 $\mu\text{m}$ ) in a stream of $\text{N}_2$ – $\text{H}_2\text{O}$ mixed gas with $p(\text{H}_2\text{O}) = 1.2$ kPa: (a) typical fitting results for the overall reaction under linear nonisothermal conditions at a $\beta$ of 5 K $\text{min}^{-1}$ and (b) contributions of individual steps at various $\beta$ values. ....  | s11        |
| <b>Figure S15.</b> Result of MDA for the multistep thermal dehydration of DCPD (63–75 $\mu\text{m}$ ) in a stream of $\text{N}_2$ – $\text{H}_2\text{O}$ mixed gas with $p(\text{H}_2\text{O}) = 2.9$ kPa: (a) typical fitting results for the overall reaction under linear nonisothermal conditions at a $\beta$ of 5 K $\text{min}^{-1}$ and (b) contributions of individual steps at various $\beta$ values. ....  | s11        |
| <b>Figure S16.</b> Result of MDA for the multistep thermal dehydration of DCPD (63–75 $\mu\text{m}$ ) in a stream of $\text{N}_2$ – $\text{H}_2\text{O}$ mixed gas with $p(\text{H}_2\text{O}) = 6.3$ kPa: (a) typical fitting results for the overall reaction under linear nonisothermal conditions at a $\beta$ of 5 K $\text{min}^{-1}$ and (b) contributions of individual steps at various $\beta$ values. ....  | s11        |
| <b>Figure S17.</b> Result of MDA for the multistep thermal dehydration of DCPD (63–75 $\mu\text{m}$ ) in a stream of $\text{N}_2$ – $\text{H}_2\text{O}$ mixed gas with $p(\text{H}_2\text{O}) = 8.1$ kPa: (a) typical fitting results for the overall reaction under linear nonisothermal conditions at a $\beta$ of 5 K $\text{min}^{-1}$ and (b) contributions of individual steps at various $\beta$ values. ....  | s12        |
| <b>Figure S18.</b> Result of MDA for the multistep thermal dehydration of DCPD (63–75 $\mu\text{m}$ ) in a stream of $\text{N}_2$ – $\text{H}_2\text{O}$ mixed gas with $p(\text{H}_2\text{O}) = 10.2$ kPa: (a) typical fitting results for the overall reaction under linear nonisothermal conditions at a $\beta$ of 5 K $\text{min}^{-1}$ and (b) contributions of individual steps at various $\beta$ values. .... | s12        |

\* Corresponding author. E-mail: nkoga@hiroshima-u.ac.jp



|                                                                                                                                                                                                                                                                                                                                                                                                                     |     |
|---------------------------------------------------------------------------------------------------------------------------------------------------------------------------------------------------------------------------------------------------------------------------------------------------------------------------------------------------------------------------------------------------------------------|-----|
| <b>Table S8.</b> Results of mathematical deconvolution analysis and subsequent formal kinetic analysis for the multistep thermal dehydration of DCPD (63–75 $\mu\text{m}$ ) in a stream of $\text{N}_2\text{-H}_2\text{O}$ mixed gas with $p(\text{H}_2\text{O}) = 8.1$ kPa.....                                                                                                                                    | s28 |
| <b>Table S9.</b> Results of mathematical deconvolution analysis and subsequent formal kinetic analysis for the multistep thermal dehydration of DCPD (63–75 $\mu\text{m}$ ) in a stream of $\text{N}_2\text{-H}_2\text{O}$ mixed gas with $p(\text{H}_2\text{O}) = 10.2$ kPa.....                                                                                                                                   | s28 |
| <b>Table S10.</b> Results of mathematical deconvolution analysis and subsequent formal kinetic analysis for the multistep thermal dehydration of DCPD (63–75 $\mu\text{m}$ ) in a stream of $\text{N}_2\text{-H}_2\text{O}$ mixed gas with $p(\text{H}_2\text{O}) = 12.6$ kPa.....                                                                                                                                  | s28 |
| <b>Table S11.</b> Results of mathematical deconvolution analysis and subsequent formal kinetic analysis for the multistep thermal dehydration of DCPD (63–75 $\mu\text{m}$ ) in a stream of $\text{N}_2\text{-H}_2\text{O}$ mixed gas with $p(\text{H}_2\text{O}) = 15.8$ kPa.....                                                                                                                                  | s29 |
| <b>Figure S49.</b> Results of KDA for the multistep thermal dehydration of DCPD (63–75 $\mu\text{m}$ ) in a stream of $\text{N}_2\text{-H}_2\text{O}$ mixed gas with $p(\text{H}_2\text{O}) = 1.2$ kPa: (a) typical fitting results for the overall reaction under linear nonisothermal conditions at a $\beta$ of 5 $\text{K min}^{-1}$ and (b) contributions of individual steps at various $\beta$ values. ....  | s29 |
| <b>Figure S50.</b> Results of KDA for the multistep thermal dehydration of DCPD (63–75 $\mu\text{m}$ ) in a stream of $\text{N}_2\text{-H}_2\text{O}$ mixed gas with $p(\text{H}_2\text{O}) = 2.9$ kPa: (a) typical fitting results for the overall reaction under linear nonisothermal conditions at a $\beta$ of 5 $\text{K min}^{-1}$ and (b) contributions of individual steps at various $\beta$ values. ....  | s29 |
| <b>Figure S51.</b> Results of KDA for the multistep thermal dehydration of DCPD (63–75 $\mu\text{m}$ ) in a stream of $\text{N}_2\text{-H}_2\text{O}$ mixed gas with $p(\text{H}_2\text{O}) = 6.3$ kPa: (a) typical fitting results for the overall reaction under linear nonisothermal conditions at a $\beta$ of 5 $\text{K min}^{-1}$ and (b) contributions of individual steps at various $\beta$ values. ....  | s30 |
| <b>Figure S52.</b> Results of KDA for the multistep thermal dehydration of DCPD (63–75 $\mu\text{m}$ ) in a stream of $\text{N}_2\text{-H}_2\text{O}$ mixed gas with $p(\text{H}_2\text{O}) = 8.1$ kPa: (a) typical fitting results for the overall reaction under linear nonisothermal conditions at a $\beta$ of 5 $\text{K min}^{-1}$ and (b) contributions of individual steps at various $\beta$ values. ....  | s30 |
| <b>Figure S53.</b> Results of KDA for the multistep thermal dehydration of DCPD (63–75 $\mu\text{m}$ ) in a stream of $\text{N}_2\text{-H}_2\text{O}$ mixed gas with $p(\text{H}_2\text{O}) = 10.2$ kPa: (a) typical fitting results for the overall reaction under linear nonisothermal conditions at a $\beta$ of 5 $\text{K min}^{-1}$ and (b) contributions of individual steps at various $\beta$ values. .... | s30 |
| <b>Figure S54.</b> Results of KDA for the multistep thermal dehydration of DCPD (63–75 $\mu\text{m}$ ) in a stream of $\text{N}_2\text{-H}_2\text{O}$ mixed gas with $p(\text{H}_2\text{O}) = 15.8$ kPa: (a) typical fitting results for the overall reaction under linear nonisothermal conditions at a $\beta$ of 5 $\text{K min}^{-1}$ and (b) contributions of individual steps at various $\beta$ values. .... | s30 |
| <b>Table S12.</b> Optimized kinetic parameters for each reaction step of the partially overlapping five-step mass loss process of the thermal dehydration of DCPD (63–75 $\mu\text{m}$ ) in a stream of $\text{N}_2\text{-H}_2\text{O}$ mixed gas with $p(\text{H}_2\text{O}) = 1.2$ kPa, averaged over different $\beta$ values .....                                                                              | s31 |
| <b>Table S13.</b> Optimized kinetic parameters for each reaction step of the partially overlapping five-step mass loss process of the thermal dehydration of DCPD (63–75 $\mu\text{m}$ ) in a stream of $\text{N}_2\text{-H}_2\text{O}$ mixed gas with $p(\text{H}_2\text{O}) = 2.9$ kPa, averaged over different $\beta$ values .....                                                                              | s31 |
| <b>Table S14.</b> Optimized kinetic parameters for each reaction step of the partially overlapping five-step mass loss process of the thermal dehydration of DCPD (63–75 $\mu\text{m}$ ) in a stream of $\text{N}_2\text{-H}_2\text{O}$ mixed gas with $p(\text{H}_2\text{O}) = 6.3$ kPa, averaged over different $\beta$ values .....                                                                              | s32 |
| <b>Table S15.</b> Optimized kinetic parameters for each reaction step of the partially overlapping five-step mass loss process of the thermal dehydration of DCPD (63–75 $\mu\text{m}$ ) in a stream of $\text{N}_2\text{-H}_2\text{O}$ mixed gas with $p(\text{H}_2\text{O}) = 8.1$ kPa, averaged over different $\beta$ values .....                                                                              | s32 |
| <b>Table S16.</b> Optimized kinetic parameters for each reaction step of the partially overlapping five-step mass loss process of the thermal dehydration of DCPD (63–75 $\mu\text{m}$ ) in a stream of $\text{N}_2\text{-H}_2\text{O}$ mixed gas with $p(\text{H}_2\text{O}) = 10.2$ kPa, averaged over different $\beta$ values .....                                                                             | s33 |
| <b>Table S17.</b> Optimized kinetic parameters for each reaction step of the partially overlapping five-step mass loss process of the thermal dehydration of DCPD (63–75 $\mu\text{m}$ ) in a stream of $\text{N}_2\text{-H}_2\text{O}$ mixed gas with $p(\text{H}_2\text{O}) = 15.8$ kPa, averaged over different $\beta$ values .....                                                                             | s33 |
| <b>Figure S55.</b> Variations in the contributions of component steps with $p(\text{H}_2\text{O})$ value at a $\beta$ of 0.5 $\text{K min}^{-1}$ .....                                                                                                                                                                                                                                                              | s34 |
| <b>Figure S56.</b> Variations in the contributions of component steps with $p(\text{H}_2\text{O})$ value at a $\beta$ of 1 $\text{K min}^{-1}$ . ....                                                                                                                                                                                                                                                               | s34 |
| <b>Figure S57.</b> Variations in the contributions of component steps with $p(\text{H}_2\text{O})$ value at a $\beta$ of 2 $\text{K min}^{-1}$ . ....                                                                                                                                                                                                                                                               | s34 |
| <b>Figure S58.</b> Variations in the contributions of component steps with $p(\text{H}_2\text{O})$ value at a $\beta$ of 3 $\text{K min}^{-1}$ . ....                                                                                                                                                                                                                                                               | s34 |
| <b>Figure S59.</b> Variations in the contributions of component steps with $p(\text{H}_2\text{O})$ value at a $\beta$ of 7 $\text{K min}^{-1}$ . ....                                                                                                                                                                                                                                                               | s34 |
| <b>Figure S60.</b> Variations in the contributions of component steps with $p(\text{H}_2\text{O})$ value at a $\beta$ of 10 $\text{K min}^{-1}$ . ....                                                                                                                                                                                                                                                              | s34 |
| <b>S5. Multistep Kinetics of the Thermal Dehydration of DCPA to form <math>\gamma</math>-CPP</b> .....                                                                                                                                                                                                                                                                                                              | s35 |
| <b>Figure S61.</b> Normalized experimental master plots for the fifth mass loss step (the thermal dehydration of DCPA to form $\gamma$ -CPP) at various atmospheric $p(\text{H}_2\text{O})$ values. ....                                                                                                                                                                                                            | s35 |
| <b>Figure S62.</b> Change in the XRD pattern of DCPA during the stepwise isothermal heating in a stream of dry $\text{N}_2$ gas: (a) XRD patterns at different temperatures, (b) changes in the peak intensity of $\gamma$ -CPP ( $2\theta = 29.16^\circ$ ), and (c) XRD pattern at 913 K.....                                                                                                                      | s35 |

## S1. Sample Characterization

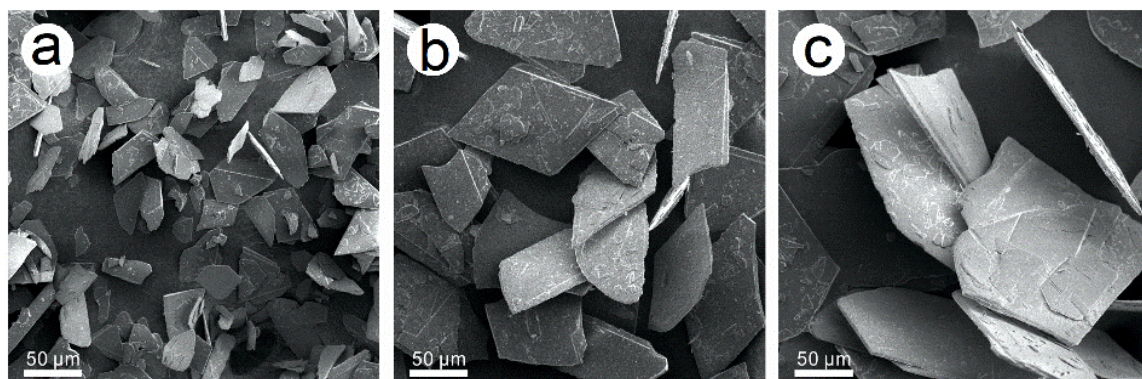

**Figure S1.** Appearances of sample particles in different particle size fractions: (a) 20–45, (b) 63–75, and (c) 90–150  $\mu\text{m}$ .

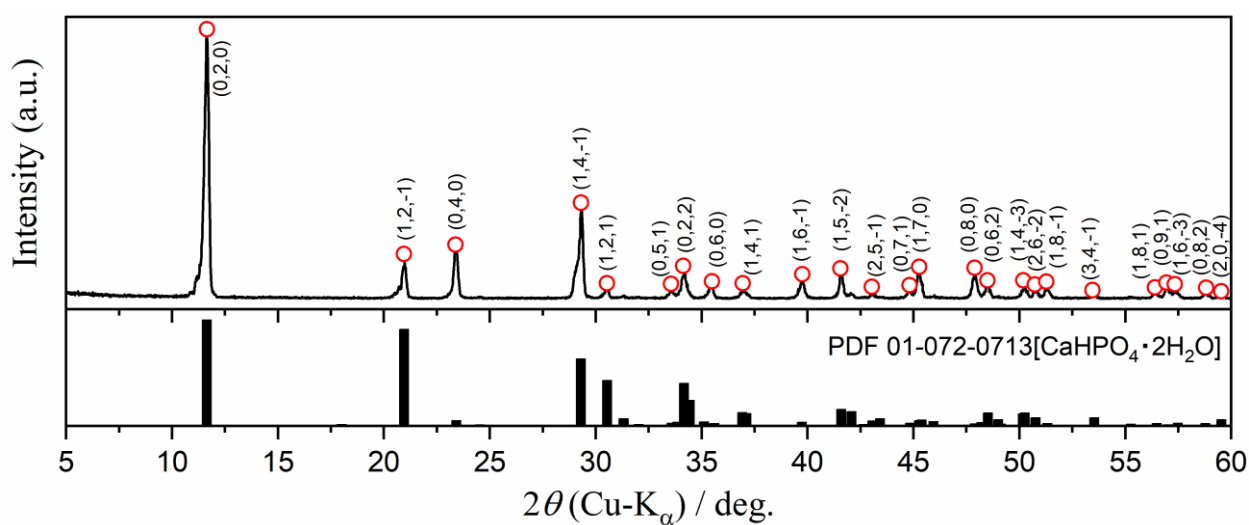

**Figure S2.** XRD pattern of DCPD.

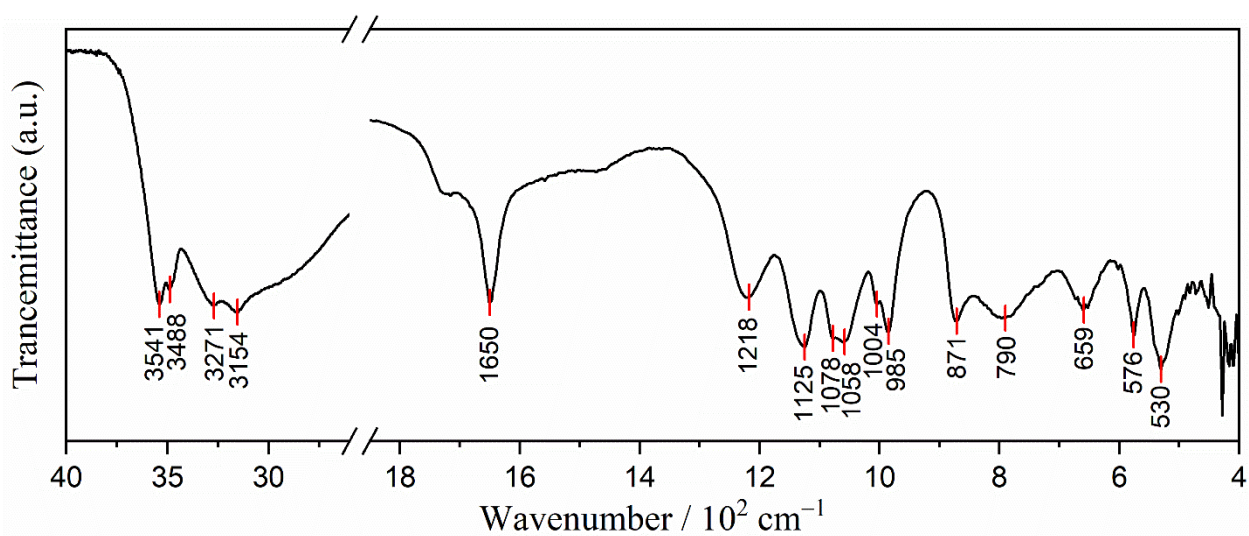

**Figure S3.** FTIR spectra of DCPD.

**Table S1.** Assignments of the IR absorption peaks of DCPD

| Wave number/<br>cm <sup>-1</sup> | Vibration mode                            |
|----------------------------------|-------------------------------------------|
| 3541,3488                        | O–H stretching modes of water             |
| 3271,3154                        |                                           |
| 1650                             | H <sub>2</sub> O bending                  |
| 1218                             | In-plane P–O–H bending                    |
| 1125,1078                        | P–O stretching modes                      |
| 1058                             |                                           |
| 1004, 985                        | P–O symmetrical stretching modes          |
| 871                              | P–O(H) Stretching modes                   |
| 790                              | Rotation of the O–H bond about the P–O(H) |
| 659                              | Water vibration                           |
| 576, 530                         | O–P–O(H) bending modes                    |

**Table S2.** Assignments of the IR absorption peaks of DCPA

| Wave number /<br>cm <sup>-1</sup> | Vibration mode             |
|-----------------------------------|----------------------------|
| 3308, 2829                        | O–H stretching             |
| 1400                              | O–H in-plane bending       |
| 1358                              | In-plane P–O–H bending     |
| 1068                              | P–O stretching ( $\nu_3$ ) |
| 999                               | P–O stretching ( $\nu_1$ ) |
| 903                               | P–O(H) stretching          |
| 575, 559                          | P–O bending ( $\nu_4$ )    |
| 538                               |                            |
| 484                               | combination                |
| 440, 411                          | P–O bending ( $\nu_2$ )    |

**Table S3.** Assignments of the IR absorption peaks of  $\gamma$ -CPP

| Wave number /<br>cm <sup>-1</sup> | Vibration mode                             |
|-----------------------------------|--------------------------------------------|
| 1136                              | Asymmetrical stretching of PO <sub>3</sub> |
| 1072                              | Symmetrical stretching of PO <sub>3</sub>  |
| 1036                              | Asymmetrical stretching of PO <sub>3</sub> |
| 933                               | Asymmetrical stretching of P–O–P           |
| 721                               | Symmetrical stretching of P–O–P            |
| 559, 538                          | PO <sub>2</sub> bending                    |
| 484, 440                          |                                            |
| 411                               |                                            |

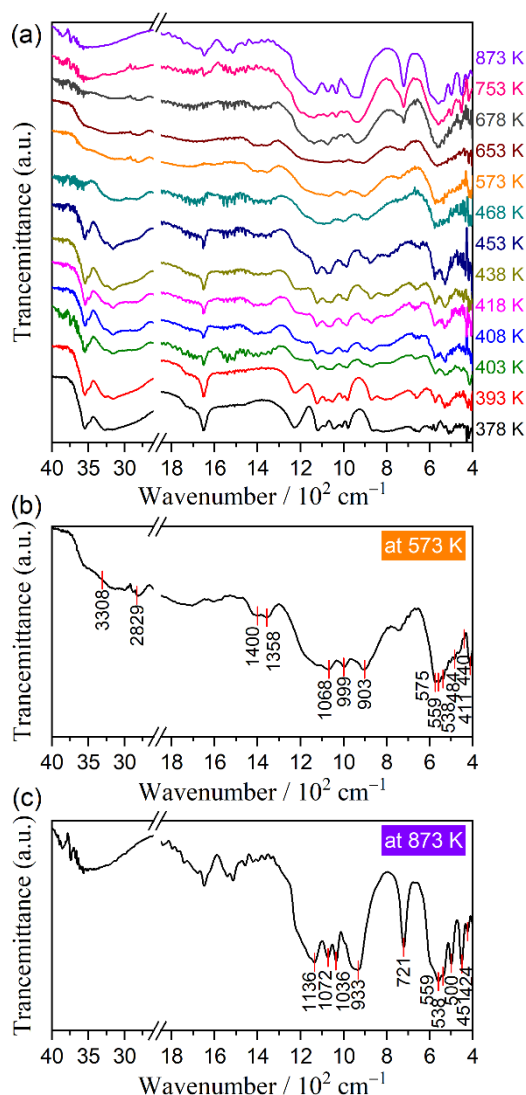

**Figure S4.** Change in the FTIR spectrum accompanied by the thermal dehydration of DCPD by heating to different temperatures at a  $\beta$  of 5 K min<sup>-1</sup> in a stream of dry N<sub>2</sub>: (a) FTIR spectrum at different temperatures, (b) FTIR spectra at 573 K, and (c) FTIR spectra at 873 K.

S2. Multistep Thermal Dehydration of DCPD in a Stream of Dry N<sub>2</sub>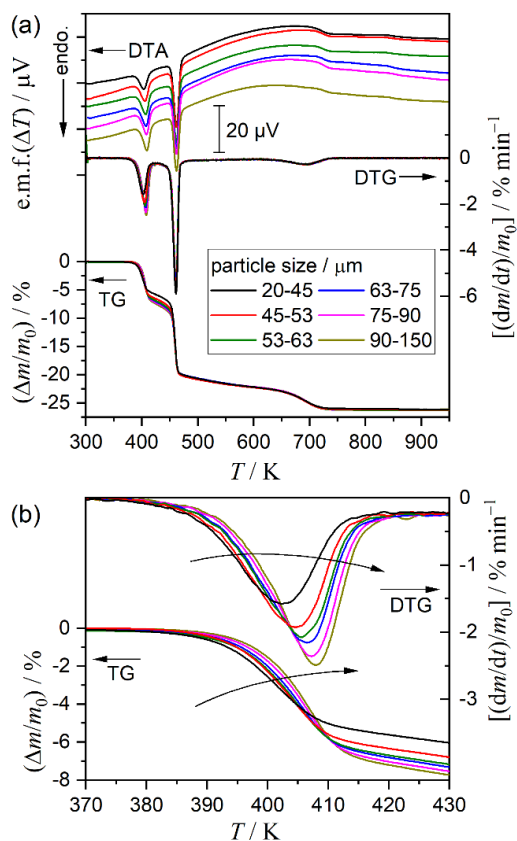

**Figure S5.** TG–DTG–DTA curves for the thermal dehydration of DCPD ( $m_0 = 5.00 \pm 0.03$  mg) with different particle sizes recorded at a  $\beta$  of  $5 \text{ K min}^{-1}$  in a stream of dry N<sub>2</sub> ( $q_v = 300 \text{ cm}^3 \text{ min}^{-1}$ ): (a) overall view and (b) focused on the first mass loss step.

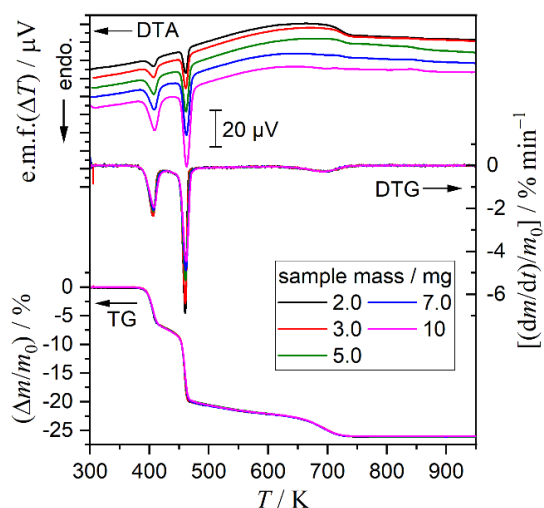

**Figure S6.** TG–DTG–DTA curves for the thermal dehydration of DCPD ( $63\text{--}75 \text{ }\mu\text{m}$ ) with different  $m_0$  values at a  $\beta$  of  $5 \text{ K min}^{-1}$  in a stream of dry N<sub>2</sub> ( $q_v = 300 \text{ cm}^3 \text{ min}^{-1}$ ).

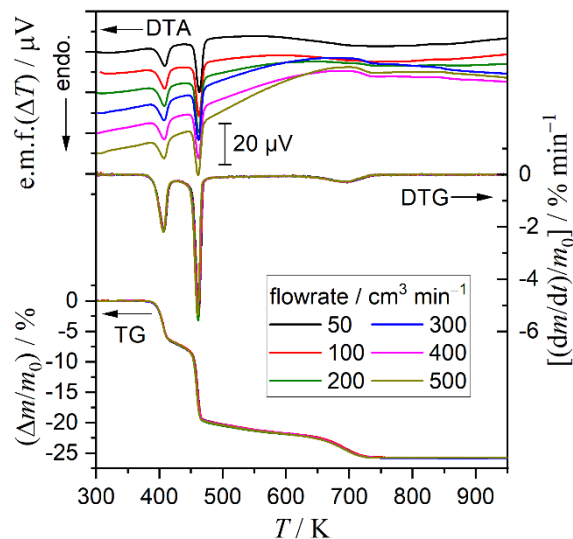

**Figure S7.** TG–DTG–DTA curves for the thermal dehydration of DCPD ( $63\text{--}75 \text{ }\mu\text{m}$ ;  $m_0 = 5.00 \pm 0.03$  mg) at a  $\beta$  of  $5 \text{ K min}^{-1}$  in a stream of dry N<sub>2</sub> at different  $q_v$  values.

### S3. Mathematical Deconvolution Analysis for the Thermal Dehydration in a Stream of Dry N<sub>2</sub>

MDA was performed for the DTG curves of the overall process under linear nonisothermal conditions by applying log-normal 4-parameter function:

$$F(t) = a_0 \exp \left[ - \frac{\ln(2) \ln \left( \frac{(t - a_1)(a_3^2 - 1)}{a_2 a_3} + 1 \right)^2}{\ln(a_3)^2} \right] \quad (\text{S1})$$

where  $a_0$ ,  $a_1$ ,  $a_2$ , and  $a_3$  are amplitude, center, width, and shape, respectively.

Figure S8 shows the typical fitting results of MDA. Irrespective of  $\beta$ , fitting using the log-normal 4-parameter functions applied to individual mass loss steps were nearly perfect exhibiting the determination coefficient ( $R^2$ ) better than 0.99 (Figure S8(a)). The contributions ( $c_i$ ) of each step  $i$  evaluated from the area ratio of the separated DTG peaks at each  $\beta$  value exhibited systematic increase in the  $c_i$  values for the first and second steps and accompanied decrease in that of the third step (Figure S8(b)).

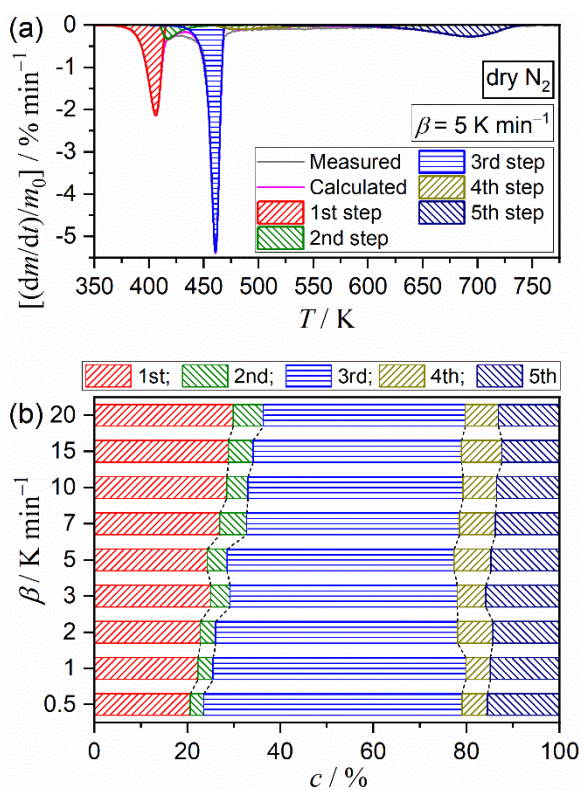

**Figure S8.** Result of MDA for the multistep thermal dehydration of DCPD (63–75  $\mu\text{m}$ ) in a stream of dry N<sub>2</sub>: (a) typical fitting results for the overall reaction under linear nonisothermal conditions at a  $\beta$  of 5 K min<sup>-1</sup> and (b) contributions of individual steps at various  $\beta$  values.

The kinetic curves of individual step at different  $\beta$  values were obtained from the separated DTG peaks by calculating the degree of reaction for each reaction step ( $\alpha_i$ ) with reference to the total area of the separated DTG peak, as shown in Figure S9. The kinetic curves of individual steps were subjected to Friedman plots (Figure S10). The  $E_{a,i}$  values at different  $\alpha_i$  determined by the Friedman plot exhibited nearly constant values for individual steps except fourth step (Figure S11). Using the  $E_{a,i}$  values average over  $0.1 \leq \alpha_i \leq 0.9$ , the hypothetical reaction rate ( $d\alpha_i/d\theta_i$ ) at an infinite temperature at different  $\alpha_i$  values were calculated based on Ozawa's generalized time ( $\theta$ ) concept.

$$\frac{d\alpha}{d\theta} = \left( \frac{d\alpha}{dt} \right) \exp \left( \frac{E_a}{RT} \right) = Af(\alpha)$$

with 
$$\theta = \int_0^t \exp \left( - \frac{E_a}{RT} \right) dt \quad (\text{S2})$$

Accordingly, experimental master plots of  $(d\alpha_i/d\theta_i)$  versus  $\alpha_i$  were created for individual steps (Figure S12). The experimental master plots were fitted using SB( $m_i$ ,  $n_i$ ,  $p_i$ ) function according to eq. (S2), and the  $A_i$  value and the kinetic exponents in SB( $m_i$ ,  $n_i$ ,  $p_i$ ) were optimized for each step. The kinetic parameters obtained by the isoconversional analysis and subsequent master plot method were summarized in Table S4. These kinetic parameters listed in Table S4 and illustrated in Figure S8(b) were used as the initial values for KDA.

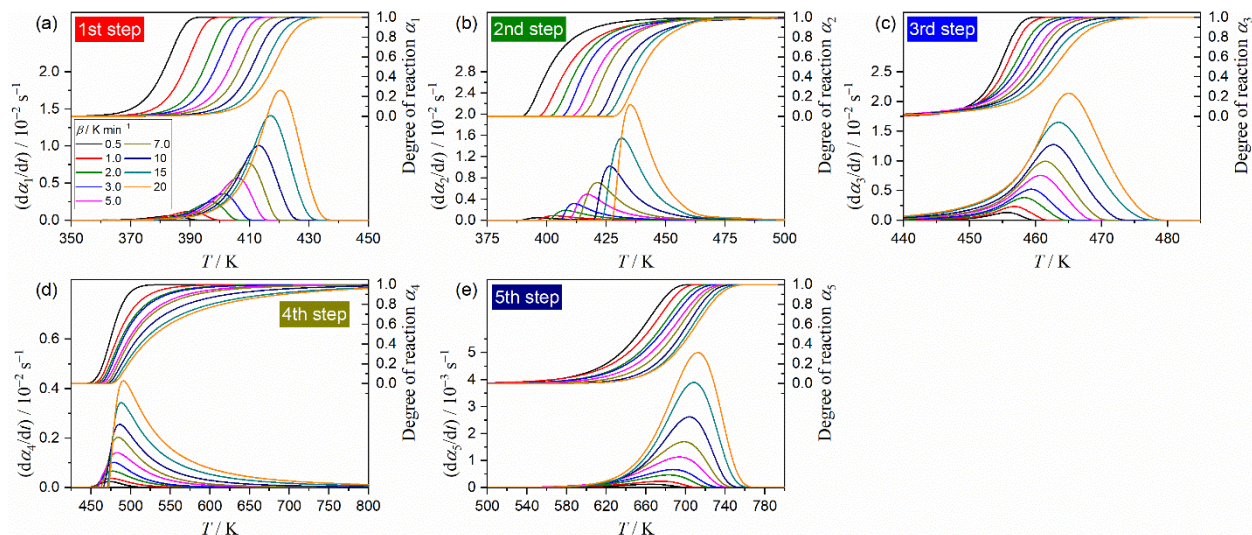

**Figure S9.** Kinetic curves for each reaction step of the multistep thermal dehydration of DCPD (63–75  $\mu\text{m}$ ) in a stream of dry  $\text{N}_2$ : (a) first, (b) second, (c) third, (d) fourth, and (e) fifth steps.

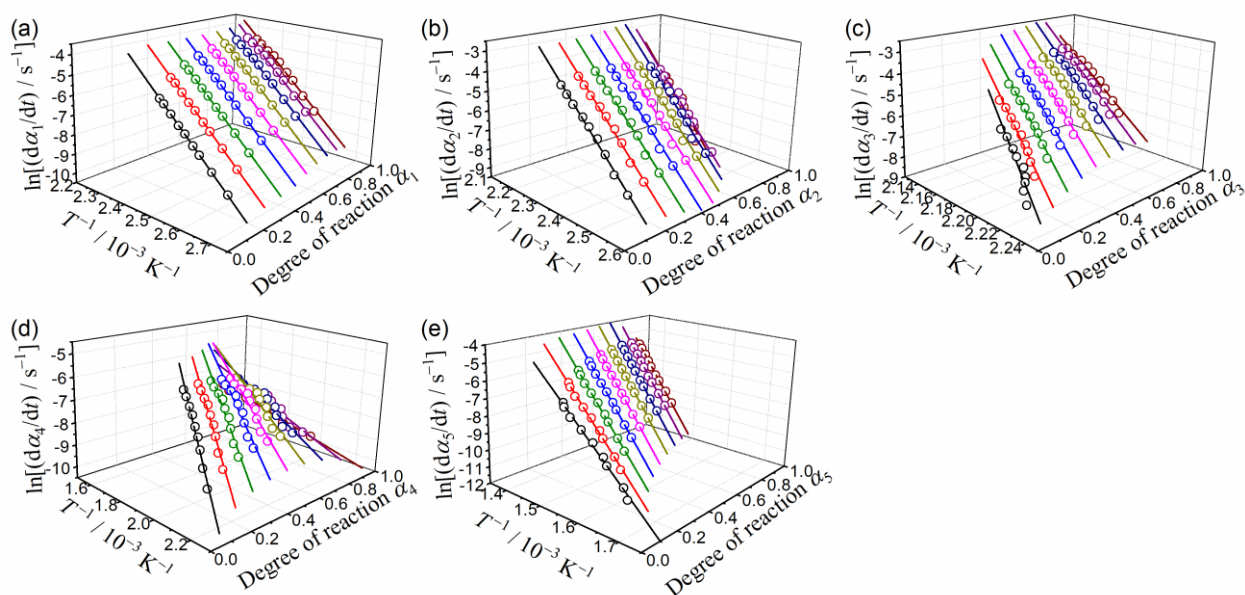

**Figure S10.** Friedman plots for each step of the multistep thermal dehydration of DCPD (63–75  $\mu\text{m}$ ) in a stream of dry  $\text{N}_2$ : (a) first, (b) second, (c) third, (d) fourth, and (e) fifth steps.



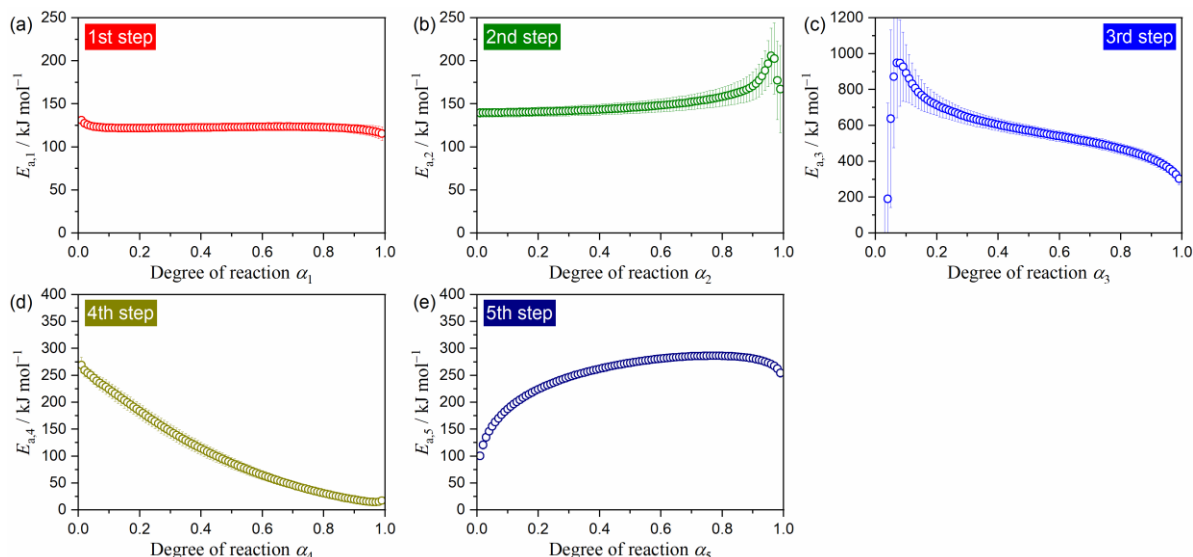

**Figure S11.**  $E_{a,i}$  values at various  $\alpha_i$  values determined by the Friedman plots applied to the mathematically separated kinetic curves: (a) first, (b) second, (c) third, (d) fourth, and (e) fifth steps.

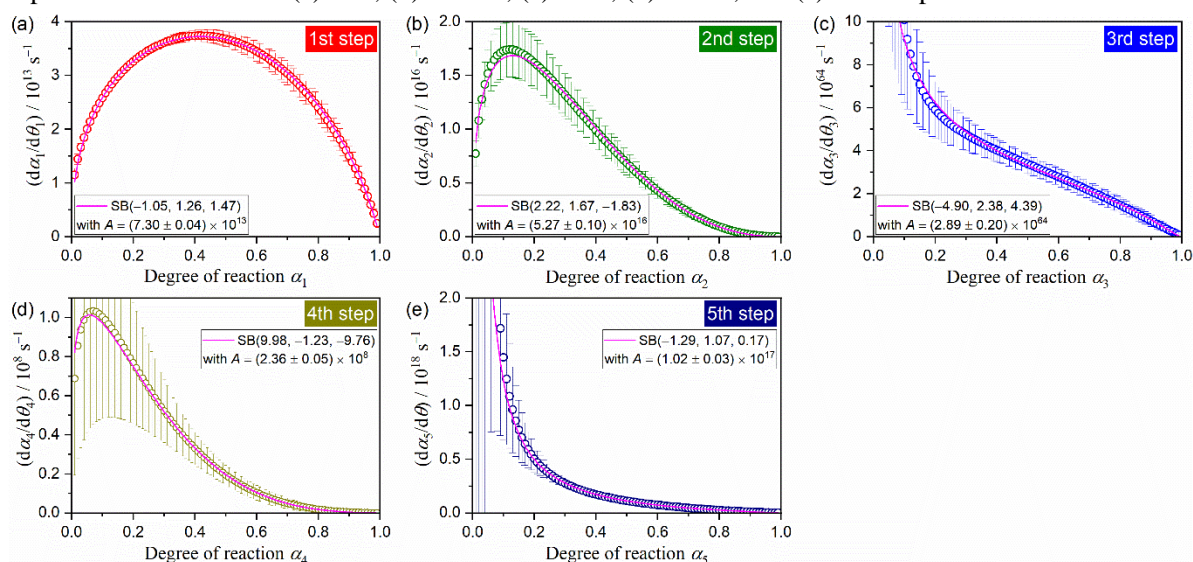

**Figure S12.** Experimental master plots for each step of the multistep thermal dehydration of DCPD in a stream of dry  $N_2$ : (a) first, (b) second, (c) third, (d) fourth, and (e) fifth steps.

**Table S4.** Results of mathematical deconvolution analysis and subsequent formal kinetic analysis for the multistep thermal dehydration of DCPD (63–75  $\mu\text{m}$ ) in a stream of dry  $N_2$

| $i$ | $E_{a,i} / \text{kJ mol}^{-1}, \text{a}$ | $\frac{d\alpha_i}{d\theta_i} = A_i f(\alpha_i)$ with $f(\alpha_i) = \alpha_i^{m_i} (1 - \alpha_i)^{n_i} [-\ln(1 - \alpha_i)]^{p_i}$ |                  |                  |                  |        | $R^2, \text{b}$ |
|-----|------------------------------------------|-------------------------------------------------------------------------------------------------------------------------------------|------------------|------------------|------------------|--------|-----------------|
|     |                                          | $A_i / \text{s}^{-1}$                                                                                                               | $m_i$            | $n_i$            | $p_i$            |        |                 |
| 1   | $122.6 \pm 0.7$                          | $(7.30 \pm 0.04) \times 10^{13}$                                                                                                    | $-1.05 \pm 0.08$ | $1.26 \pm 0.04$  | $1.47 \pm 0.08$  | 0.9995 |                 |
| 2   | $148.0 \pm 7.8$                          | $(5.27 \pm 0.10) \times 10^{16}$                                                                                                    | $2.22 \pm 0.20$  | $1.67 \pm 0.08$  | $-1.83 \pm 0.19$ | 0.9992 |                 |
| 3   | $586.2 \pm 107.2$                        | $(2.89 \pm 0.20) \times 10^{64}$                                                                                                    | $-4.90 \pm 0.60$ | $2.38 \pm 0.22$  | $4.39 \pm 0.57$  | 0.9961 |                 |
| 4   | $99.2 \pm 60.7$                          | $(2.36 \pm 0.05) \times 10^8$                                                                                                       | $9.98 \pm 0.25$  | $-1.23 \pm 0.10$ | $-9.76 \pm 0.24$ | 0.9995 |                 |
| 5   | $261.8 \pm 27.4$                         | $(1.02 \pm 0.03) \times 10^{17}$                                                                                                    | $-1.29 \pm 0.13$ | $1.07 \pm 0.04$  | $0.17 \pm 0.11$  | 0.9997 |                 |

<sup>a</sup>Average value over  $0.1 \leq \alpha \leq 0.9$ .

<sup>b</sup>Determination coefficient of the nonlinear least-squares analysis for fitting the experimental master plot.

S4. Kinetic Analysis for the Thermal Dehydration in a Stream of  $N_2$ - $H_2O$  mixed gas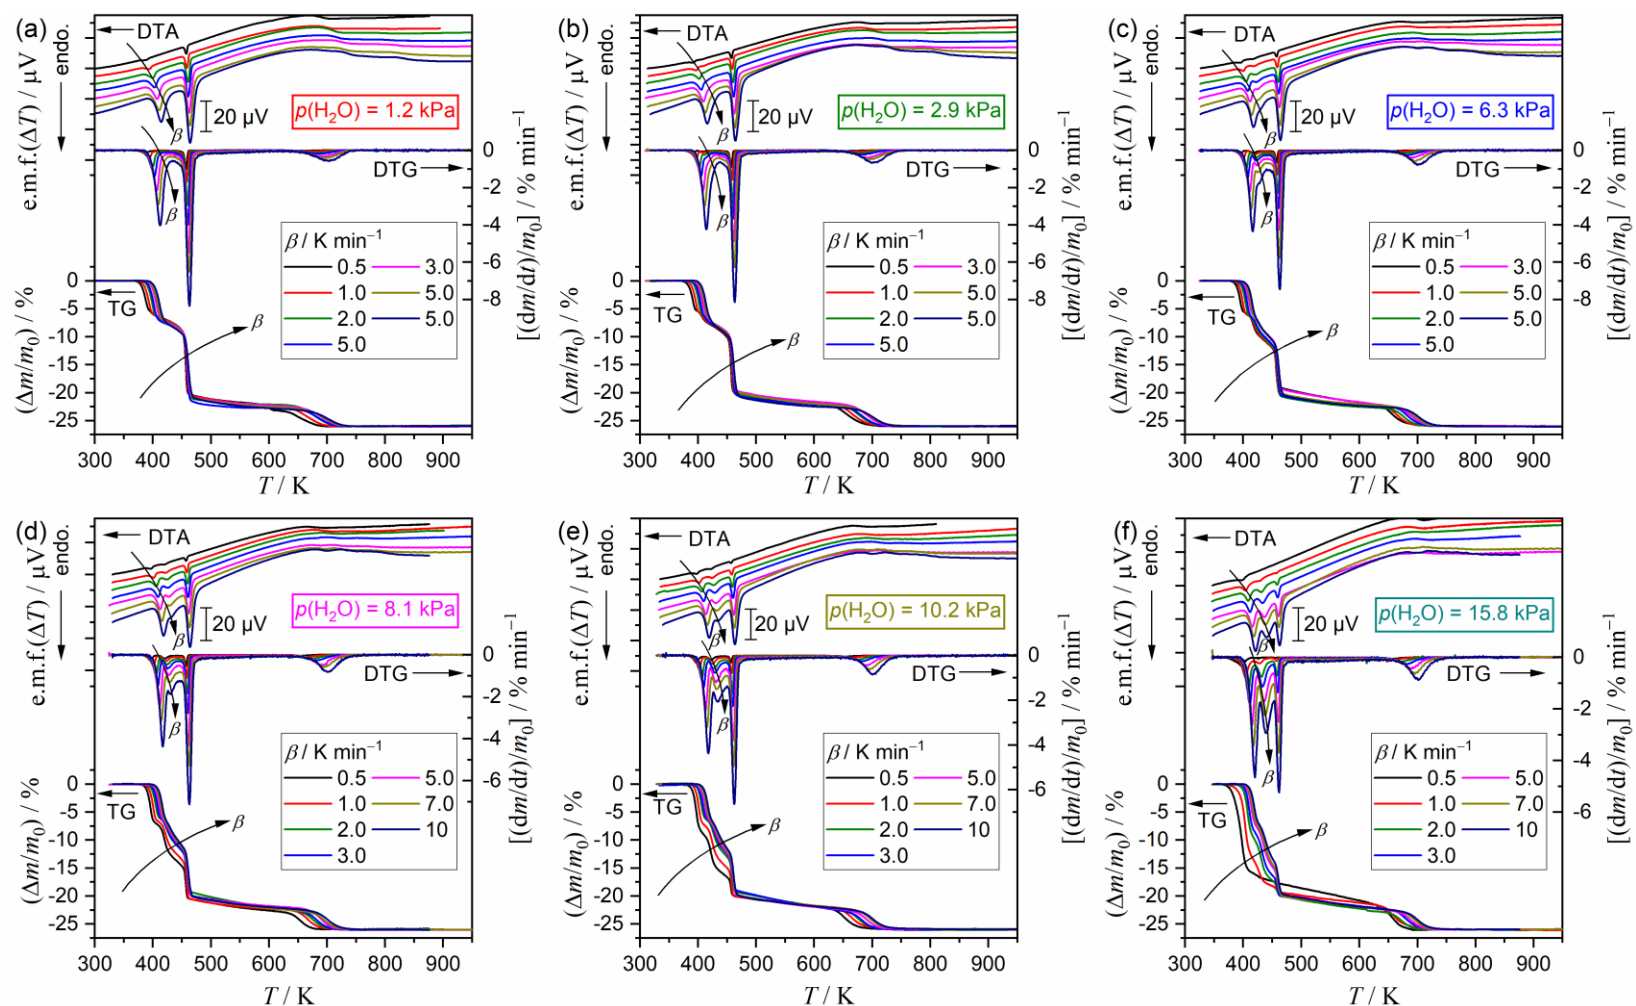

**Figure S13.** TG–DTG–DTA curves for the thermal dehydration of DCPD (63–75  $\mu\text{m}$ ;  $m_0 = 5.01 \pm 0.03$  mg) recorded at different  $\beta$  values in a stream of  $N_2$ - $H_2O$  mixed gas ( $q_v = 200$   $\text{cm}^3$   $\text{min}^{-1}$ ) with different  $p(\text{H}_2\text{O})$  values: (a) 1.2 kPa, (b) 2.9 kPa, (c) 6.3 kPa, (d) 8.1 kPa, (e) 10.2 kPa, and (f) 15.8 kPa.

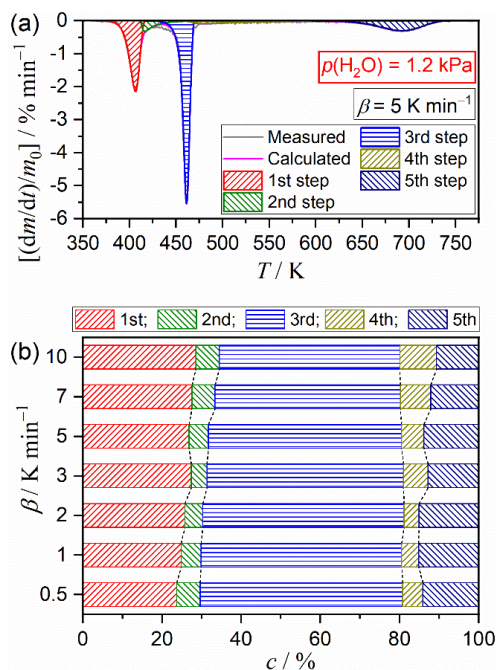

**Figure S14.** Result of MDA for the multistep thermal dehydration of DCPD (63–75  $\mu\text{m}$ ) in a stream of  $\text{N}_2$ – $\text{H}_2\text{O}$  mixed gas with  $p(\text{H}_2\text{O}) = 1.2$  kPa: (a) typical fitting results for the overall reaction under linear nonisothermal conditions at a  $\beta$  of  $5 \text{ K min}^{-1}$  and (b) contributions of individual steps at various  $\beta$  values.

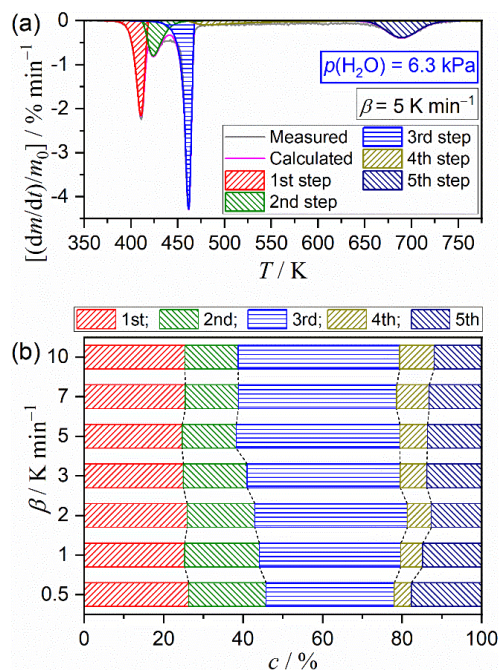

**Figure S16.** Result of MDA for the multistep thermal dehydration of DCPD (63–75  $\mu\text{m}$ ) in a stream of  $\text{N}_2$ – $\text{H}_2\text{O}$  mixed gas with  $p(\text{H}_2\text{O}) = 6.3$  kPa: (a) typical fitting results for the overall reaction under linear nonisothermal conditions at a  $\beta$  of  $5 \text{ K min}^{-1}$  and (b) contributions of individual steps at various  $\beta$  values.

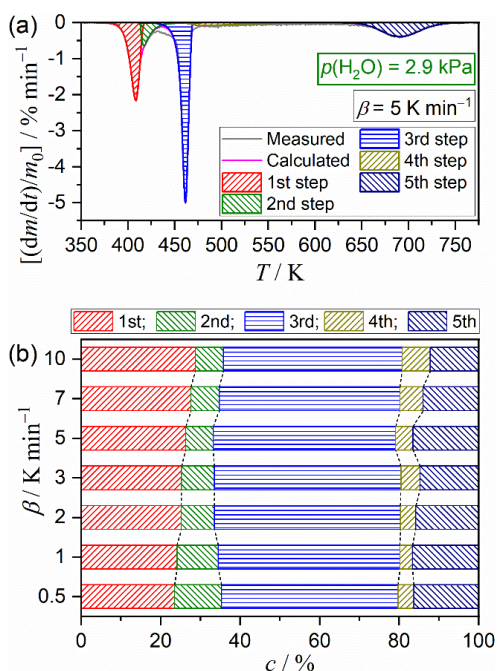

**Figure S15.** Result of MDA for the multistep thermal dehydration of DCPD (63–75  $\mu\text{m}$ ) in a stream of  $\text{N}_2$ – $\text{H}_2\text{O}$  mixed gas with  $p(\text{H}_2\text{O}) = 2.9$  kPa: (a) typical fitting results for the overall reaction under linear nonisothermal conditions at a  $\beta$  of  $5 \text{ K min}^{-1}$  and (b) contributions of individual steps at various  $\beta$  values.

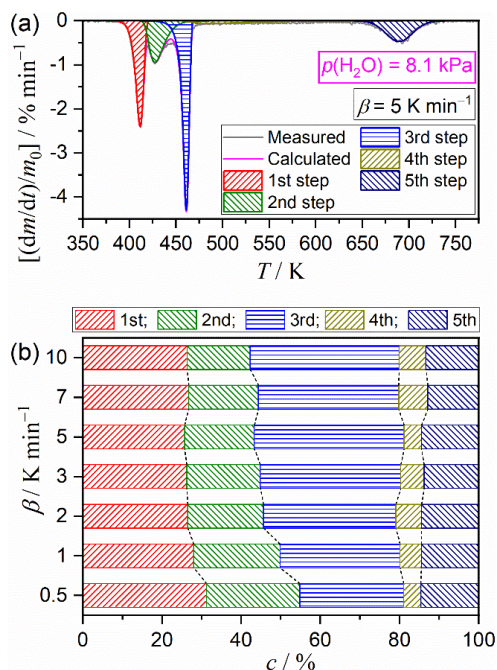

**Figure S17.** Result of MDA for the multistep thermal dehydration of DCPD (63–75  $\mu\text{m}$ ) in a stream of  $\text{N}_2$ – $\text{H}_2\text{O}$  mixed gas with  $p(\text{H}_2\text{O}) = 8.1$  kPa: (a) typical fitting results for the overall reaction under linear nonisothermal conditions at a  $\beta$  of  $5 \text{ K min}^{-1}$  and (b) contributions of individual steps at various  $\beta$  values.

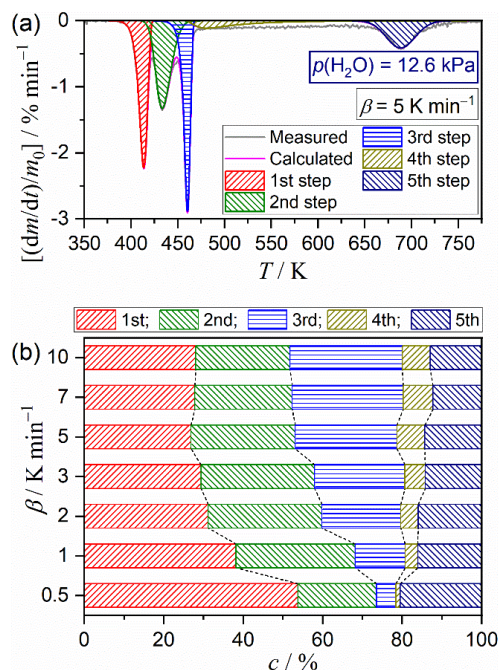

**Figure S19.** Result of MDA for the multistep thermal dehydration of DCPD (63–75  $\mu\text{m}$ ) in a stream of  $\text{N}_2$ – $\text{H}_2\text{O}$  mixed gas with  $p(\text{H}_2\text{O}) = 12.6$  kPa: (a) typical fitting results for the overall reaction under linear nonisothermal conditions at a  $\beta$  of  $5 \text{ K min}^{-1}$  and (b) contributions of individual steps at various  $\beta$  values.

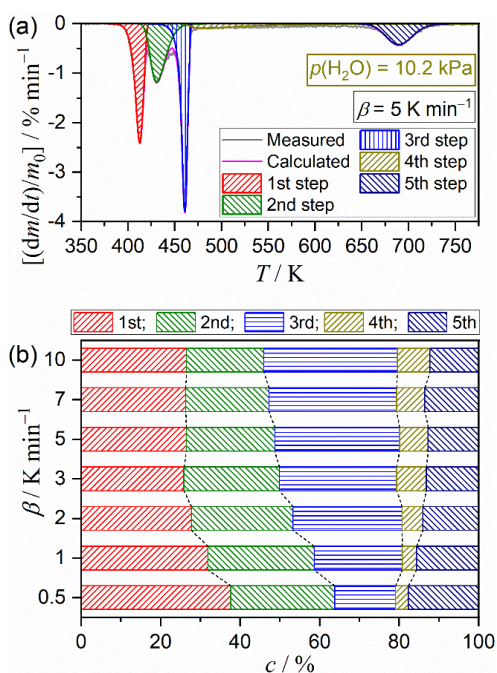

**Figure S18.** Result of MDA for the multistep thermal dehydration of DCPD (63–75  $\mu\text{m}$ ) in a stream of  $\text{N}_2$ – $\text{H}_2\text{O}$  mixed gas with  $p(\text{H}_2\text{O}) = 10.2$  kPa: (a) typical fitting results for the overall reaction under linear nonisothermal conditions at a  $\beta$  of  $5 \text{ K min}^{-1}$  and (b) contributions of individual steps at various  $\beta$  values.

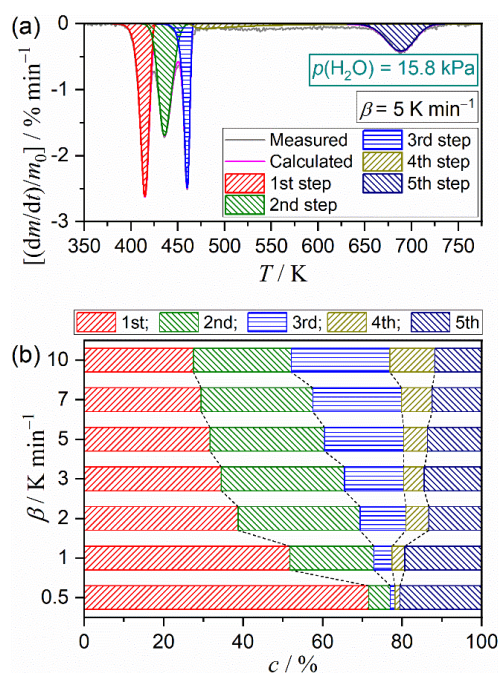

**Figure S20.** Result of MDA for the multistep thermal dehydration of DCPD (63–75  $\mu\text{m}$ ) in a stream of  $\text{N}_2$ – $\text{H}_2\text{O}$  mixed gas with  $p(\text{H}_2\text{O}) = 15.8$  kPa: (a) typical fitting results for the overall reaction under linear nonisothermal conditions at a  $\beta$  of  $5 \text{ K min}^{-1}$  and (b) contributions of individual steps at various  $\beta$  values.

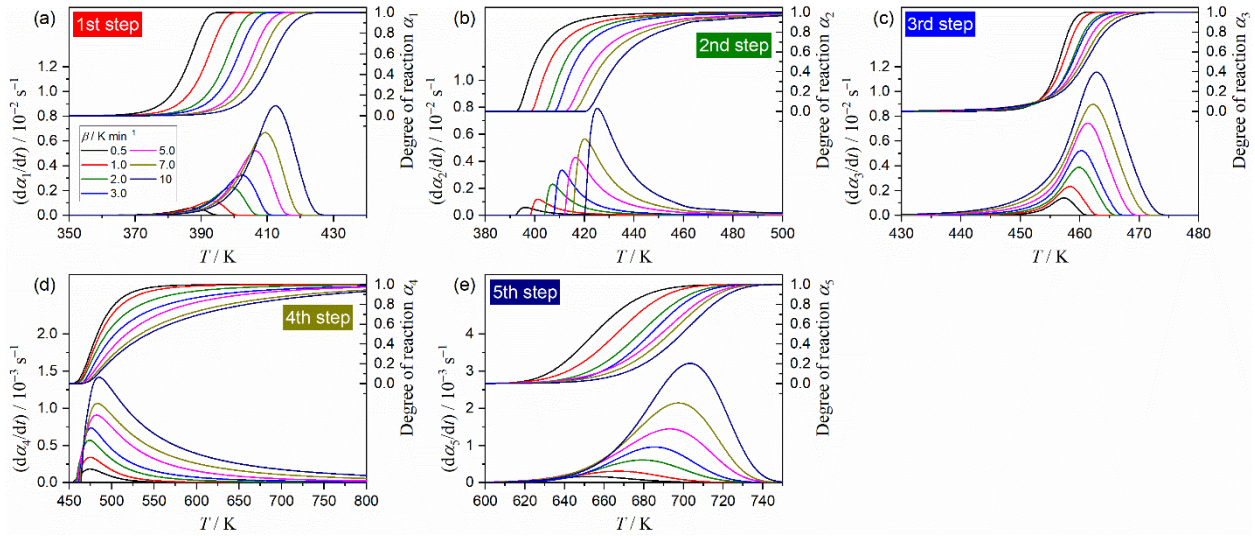

**Figure S21.** Kinetic curves for each reaction step of the multistep thermal dehydration of DCPD (63–75  $\mu\text{m}$ ) in a stream of  $\text{N}_2\text{--H}_2\text{O}$  mixed gas with  $p(\text{H}_2\text{O}) = 1.2$  kPa: (a) first, (b) second, (c) third, (d) fourth, and (e) fifth steps.

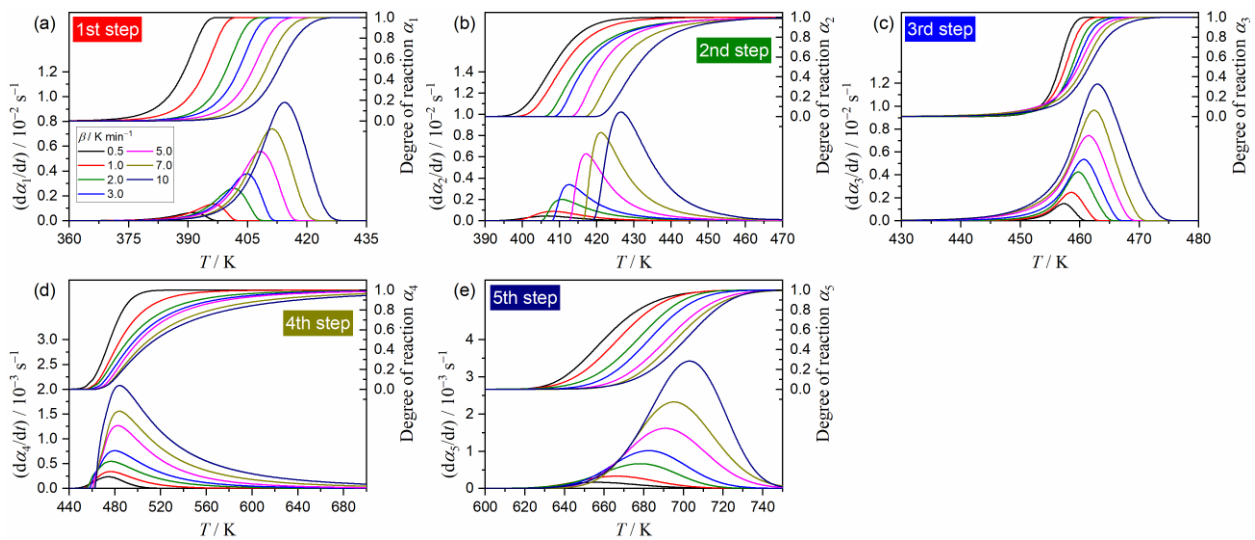

**Figure S22.** Kinetic curves for each reaction step of the multistep thermal dehydration of DCPD (63–75  $\mu\text{m}$ ) in a stream of  $\text{N}_2\text{--H}_2\text{O}$  mixed gas with  $p(\text{H}_2\text{O}) = 2.9$  kPa: (a) first, (b) second, (c) third, (d) fourth, and (e) fifth steps.

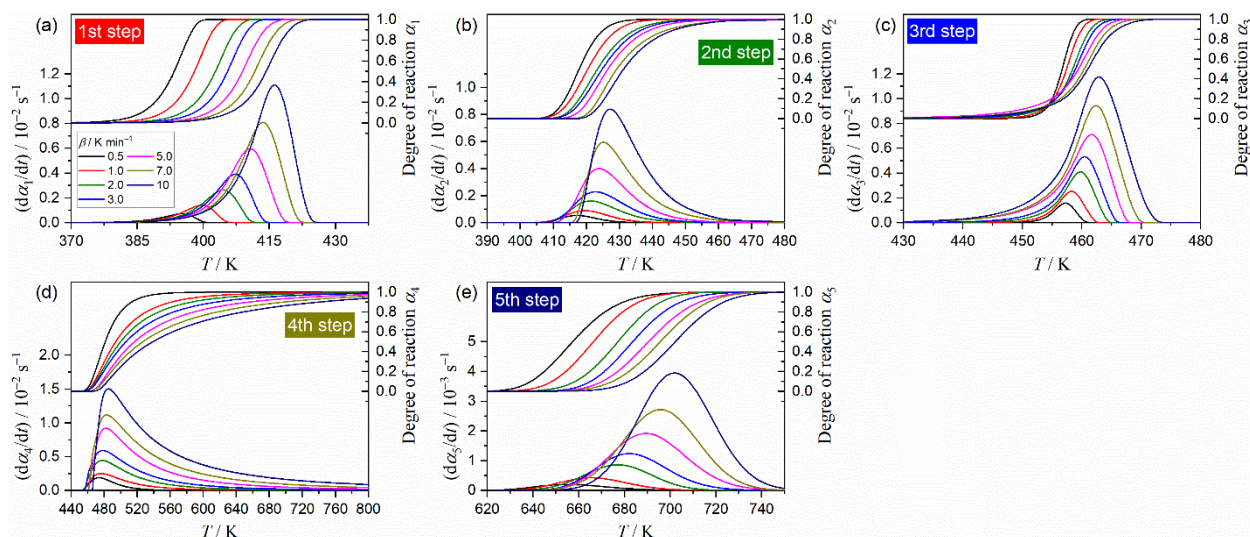

**Figure S23.** Kinetic curves for each reaction step of the multistep thermal dehydration of DCPD (63–75 μm) in a stream of N<sub>2</sub>–H<sub>2</sub>O mixed gas with  $p(\text{H}_2\text{O}) = 6.3$  kPa: (a) first, (b) second, (c) third, (d) fourth, and (e) fifth steps.

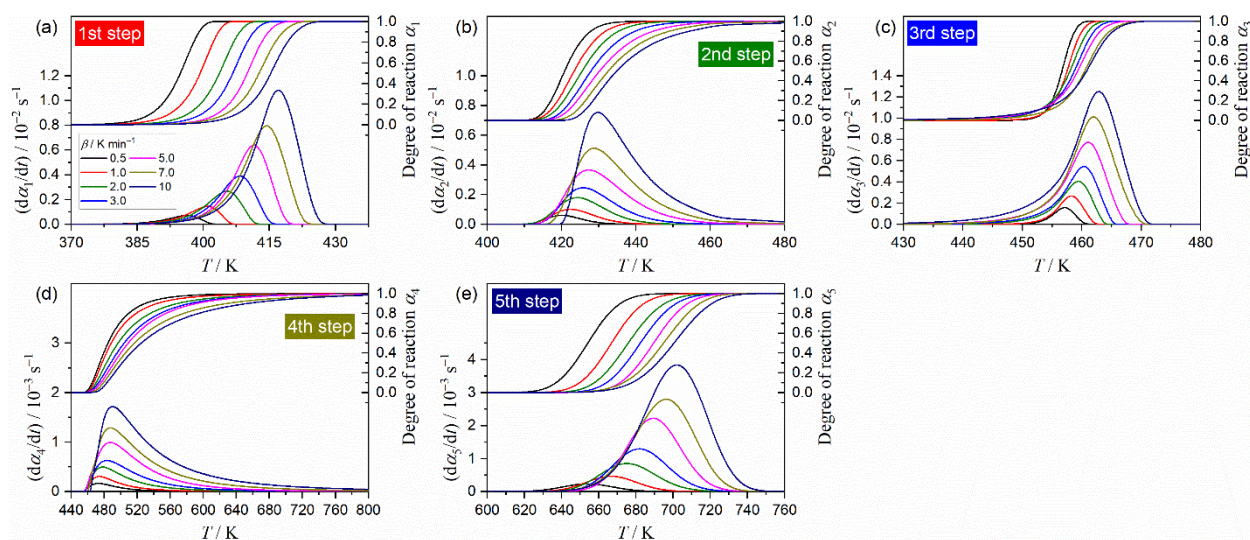

**Figure S24.** Kinetic curves for each reaction step of the multistep thermal dehydration of DCPD (63–75 μm) in a stream of N<sub>2</sub>–H<sub>2</sub>O mixed gas with  $p(\text{H}_2\text{O}) = 8.1$  kPa: (a) first, (b) second, (c) third, (d) fourth, and (e) fifth steps.

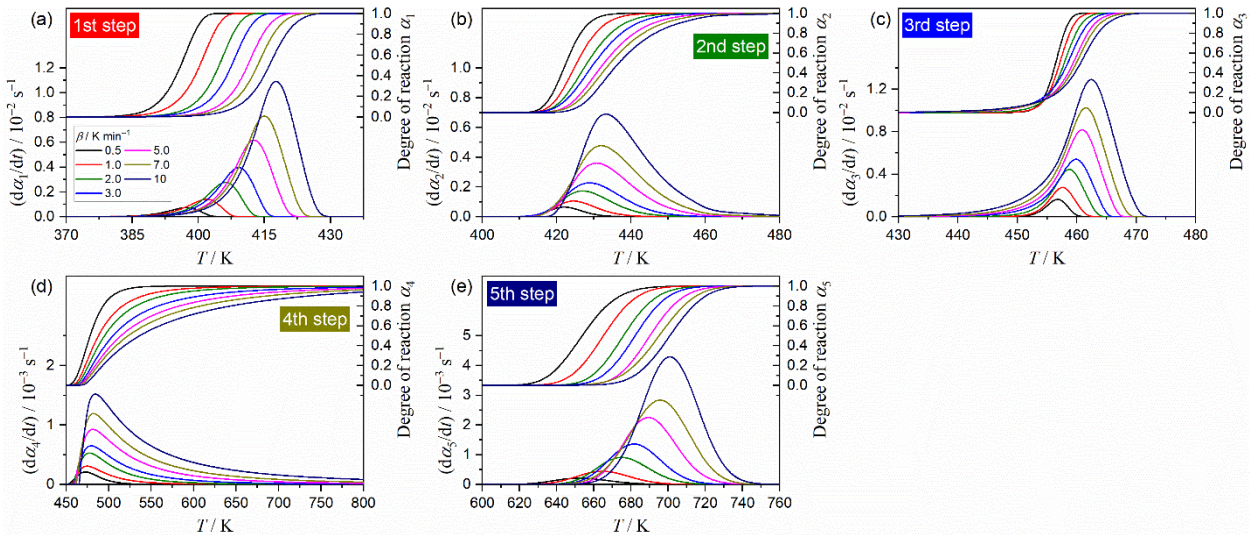

**Figure S25.** Kinetic curves for each reaction step of the multistep thermal dehydration of DCPD (63–75  $\mu\text{m}$ ) in a stream of  $\text{N}_2\text{--H}_2\text{O}$  mixed gas with  $p(\text{H}_2\text{O}) = 10.2$  kPa: (a) first, (b) second, (c) third, (d) fourth, and (e) fifth steps.

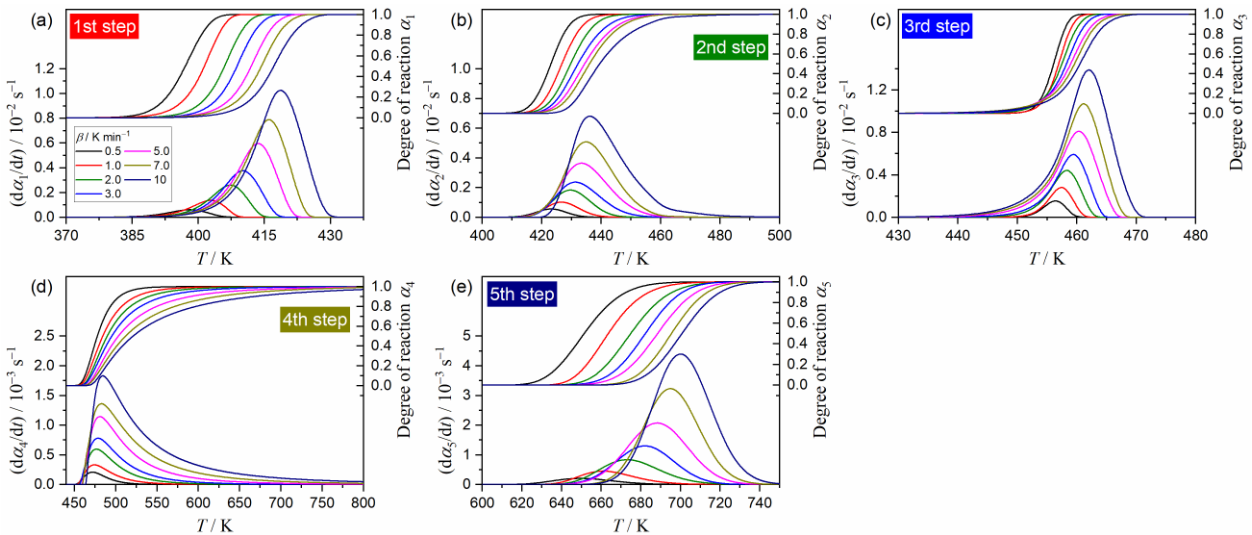

**Figure S26.** Kinetic curves for each reaction step of the multistep thermal dehydration of DCPD (63–75  $\mu\text{m}$ ) in a stream of  $\text{N}_2\text{--H}_2\text{O}$  mixed gas with  $p(\text{H}_2\text{O}) = 12.6$  kPa: (a) first, (b) second, (c) third, (d) fourth, and (e) fifth steps.

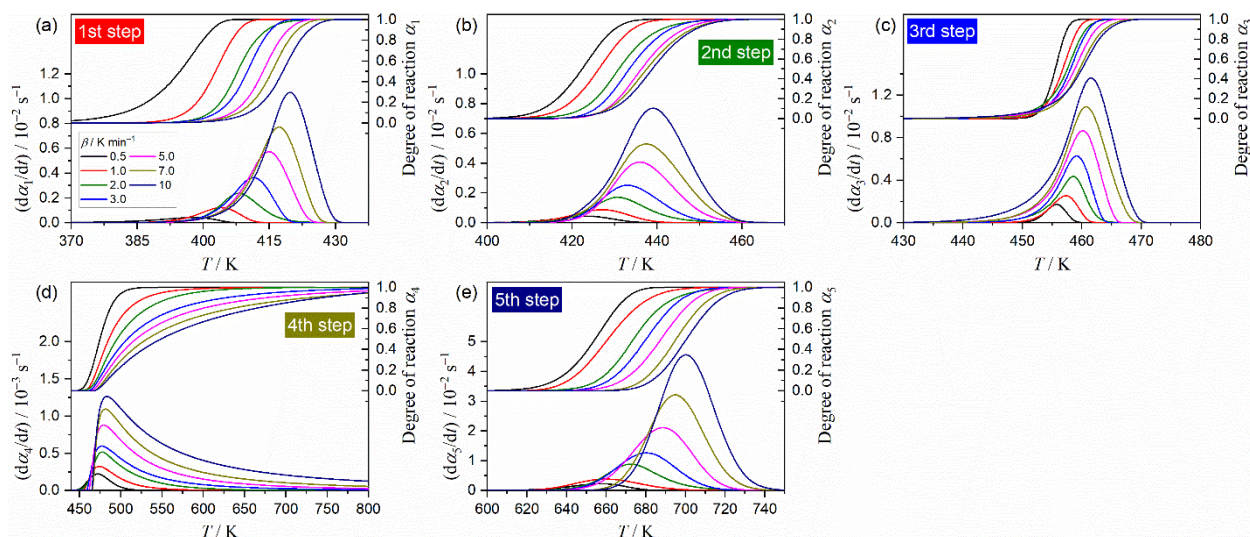

**Figure S27.** Kinetic curves for each reaction step of the multistep thermal dehydration of DCPD (63–75  $\mu\text{m}$ ) in a stream of  $\text{N}_2\text{-H}_2\text{O}$  mixed gas with  $p(\text{H}_2\text{O}) = 15.8$  kPa: (a) first, (b) second, (c) third, (d) fourth, and (e) fifth steps.

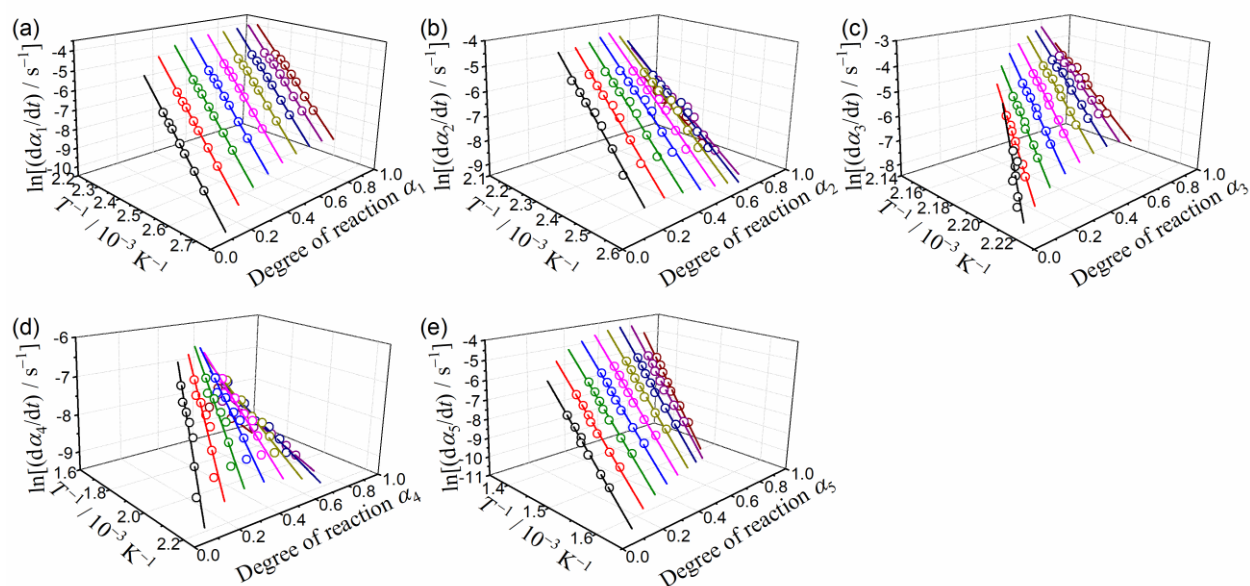

**Figure S28.** Friedman plots for each step of the multistep thermal dehydration of DCPD (63–75  $\mu\text{m}$ ) in a stream of  $\text{N}_2\text{-H}_2\text{O}$  mixed gas with  $p(\text{H}_2\text{O}) = 1.2$  kPa: (a) first, (b) second, (c) third, (d) fourth, and (e) fifth steps.



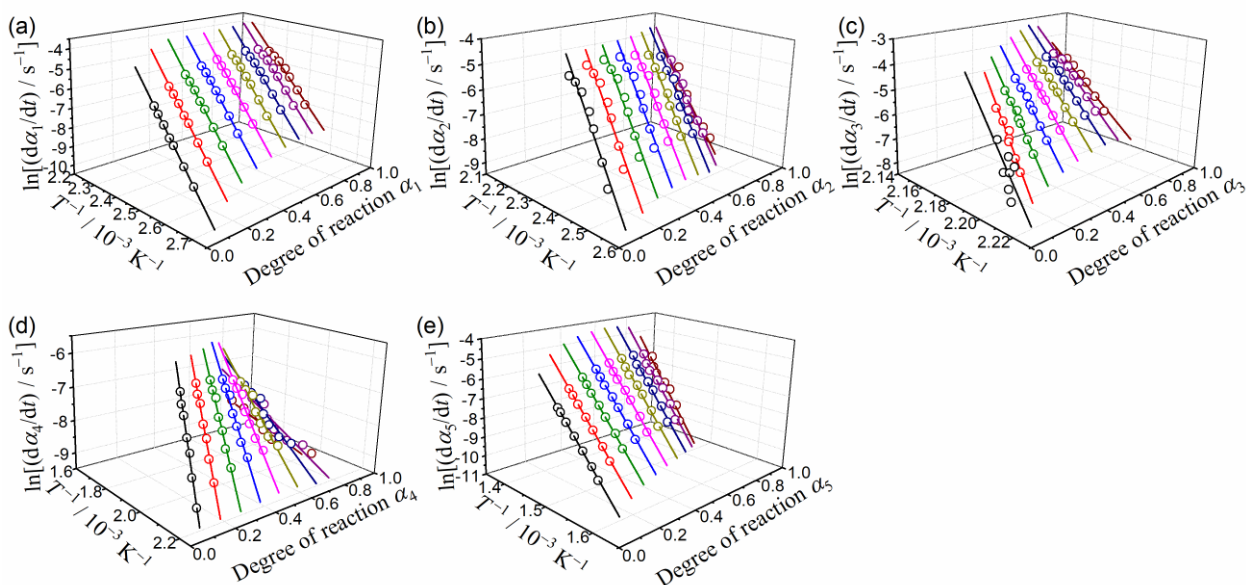

**Figure S29.** Friedman plots for each step of the multistep thermal dehydration of DCPD (63–75  $\mu\text{m}$ ) in a stream of  $\text{N}_2\text{-H}_2\text{O}$  mixed gas with  $p(\text{H}_2\text{O}) = 2.9$  kPa: (a) first, (b) second, (c) third, (d) fourth, and (e) fifth steps.

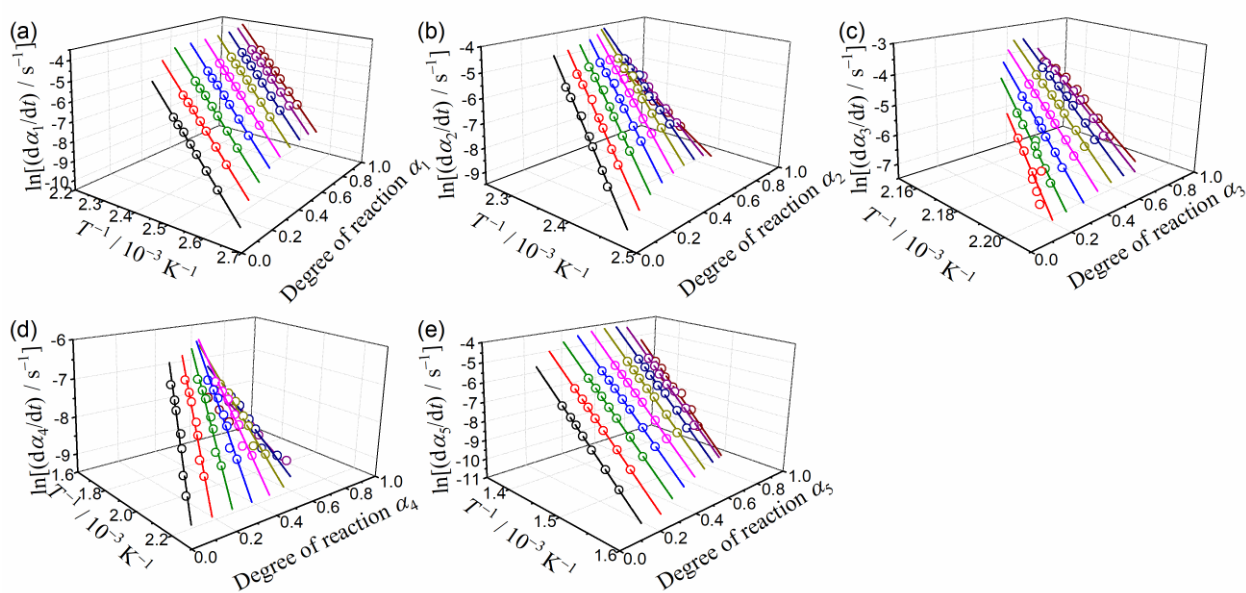

**Figure S30.** Friedman plots for each step of the multistep thermal dehydration of DCPD (63–75  $\mu\text{m}$ ) in a stream of  $\text{N}_2\text{-H}_2\text{O}$  mixed gas with  $p(\text{H}_2\text{O}) = 6.3$  kPa: (a) first, (b) second, (c) third, (d) fourth, and (e) fifth steps.

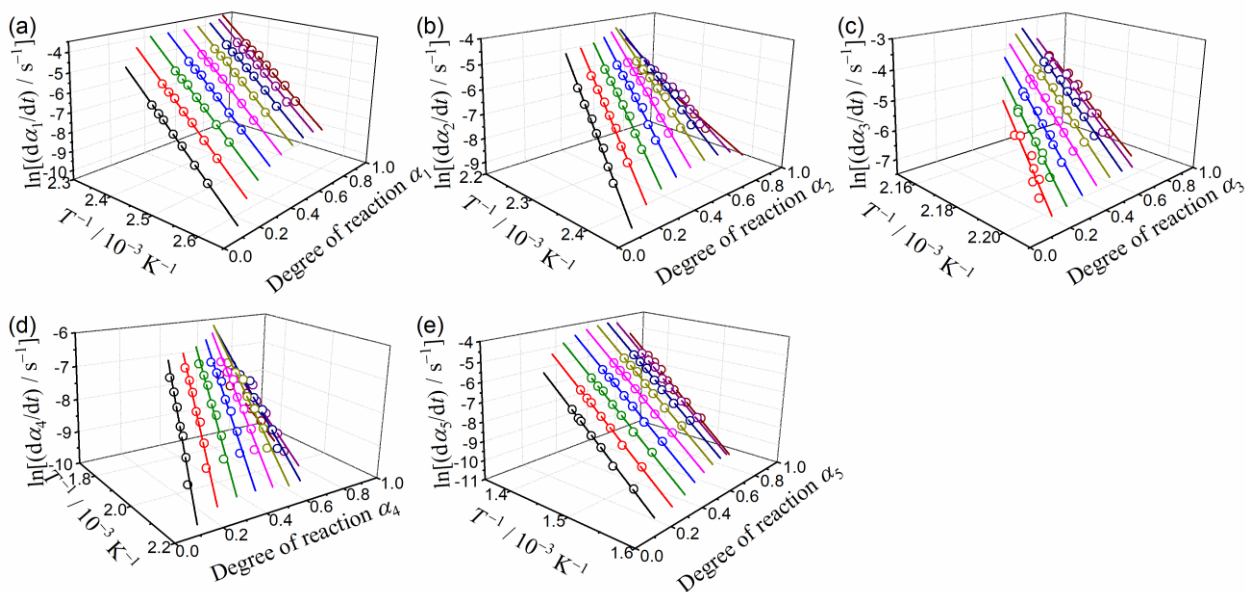

**Figure S31.** Friedman plots for each step of the multistep thermal dehydration of DCPD (63–75  $\mu\text{m}$ ) in a stream of  $\text{N}_2\text{-H}_2\text{O}$  mixed gas with  $p(\text{H}_2\text{O}) = 8.1$  kPa: (a) first, (b) second, (c) third, (d) fourth, and (e) fifth steps.

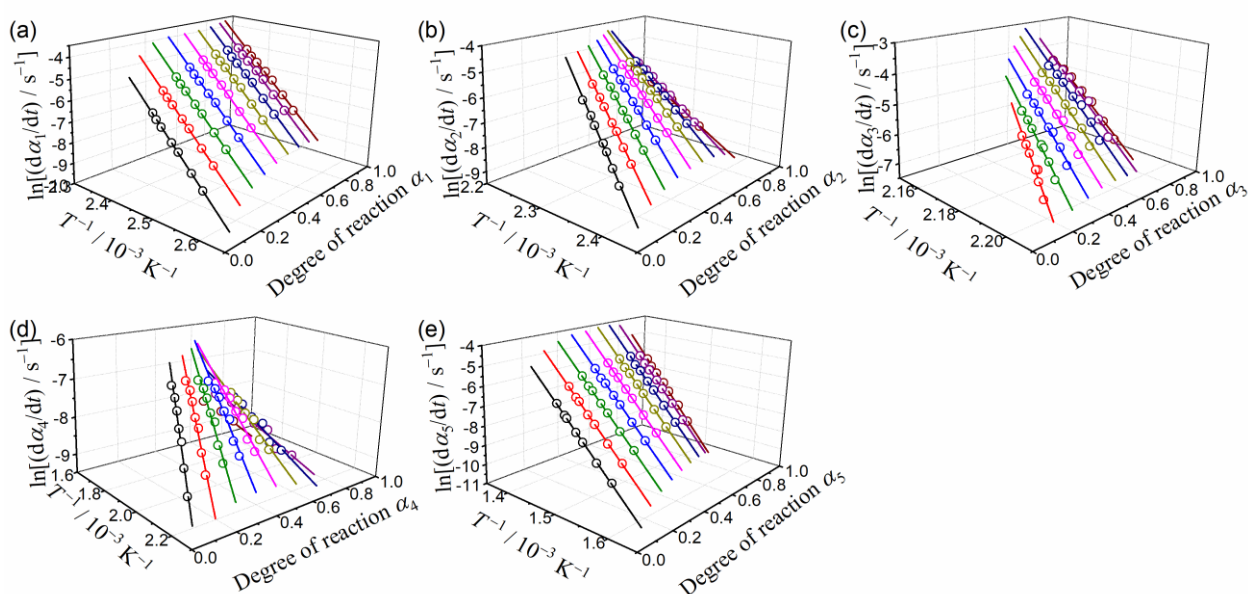

**Figure S32.** Friedman plots for each step of the multistep thermal dehydration of DCPD (63–75  $\mu\text{m}$ ) in a stream of  $\text{N}_2\text{-H}_2\text{O}$  mixed gas with  $p(\text{H}_2\text{O}) = 10.2$  kPa: (a) first, (b) second, (c) third, (d) fourth, and (e) fifth steps.

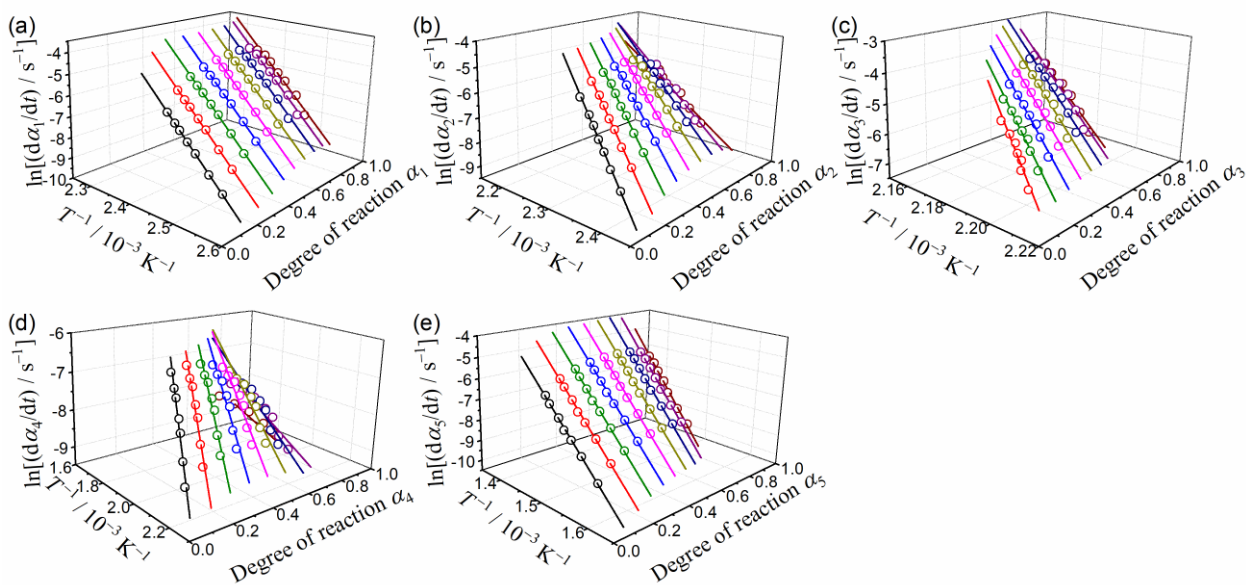

**Figure S33.** Friedman plots for each step of the multistep thermal dehydration of DCPD (63–75  $\mu\text{m}$ ) in a stream of  $\text{N}_2\text{-H}_2\text{O}$  mixed gas with  $p(\text{H}_2\text{O}) = 12.6$  kPa: (a) first, (b) second, (c) third, (d) fourth, and (e) fifth steps.

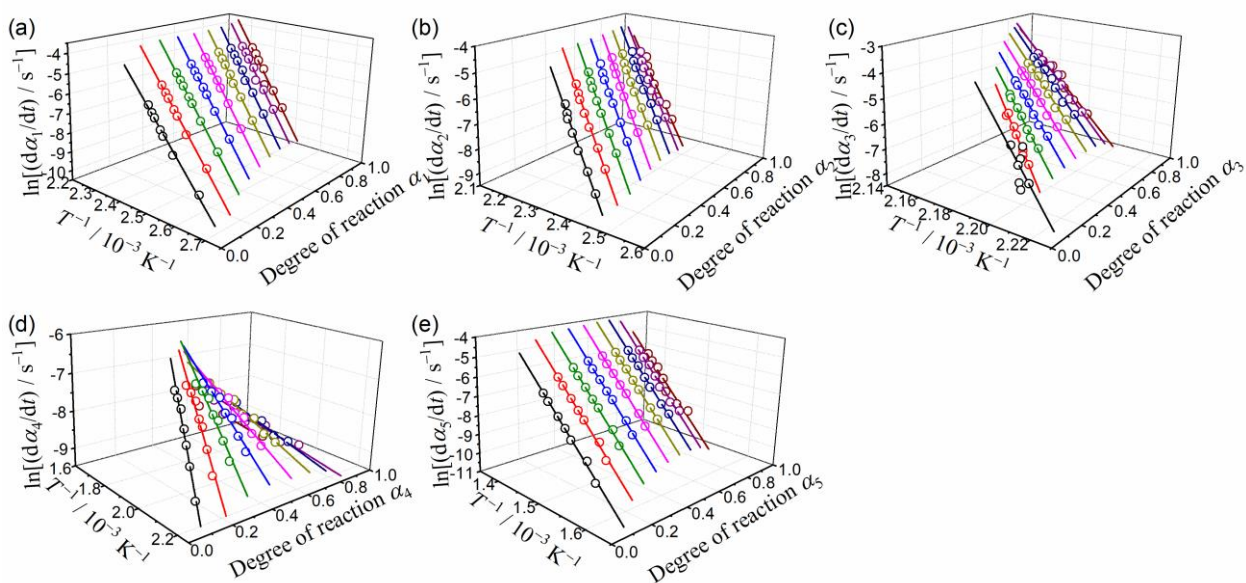

**Figure S34.** Friedman plots for each step of the multistep thermal dehydration of DCPD (63–75  $\mu\text{m}$ ) in a stream of  $\text{N}_2\text{-H}_2\text{O}$  mixed gas with  $p(\text{H}_2\text{O}) = 15.8$  kPa: (a) first, (b) second, (c) third, (d) fourth, and (e) fifth steps.

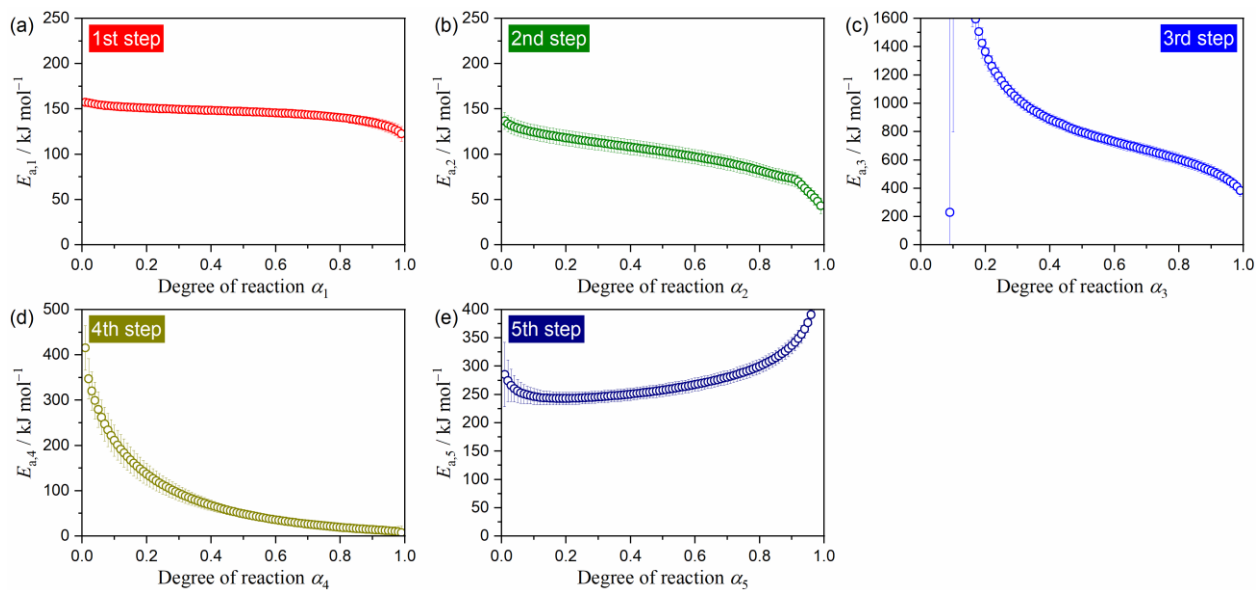

**Figure S35.**  $E_{a,i}$  values at various  $\alpha_i$  for each step of the multistep thermal dehydration of DCPD (63–75  $\mu\text{m}$ ) in a stream of  $\text{N}_2\text{-H}_2\text{O}$  mixed gas with  $p(\text{H}_2\text{O}) = 1.2$  kPa: (a) first, (b) second, (c) third, (d) fourth, and (e) fifth steps.

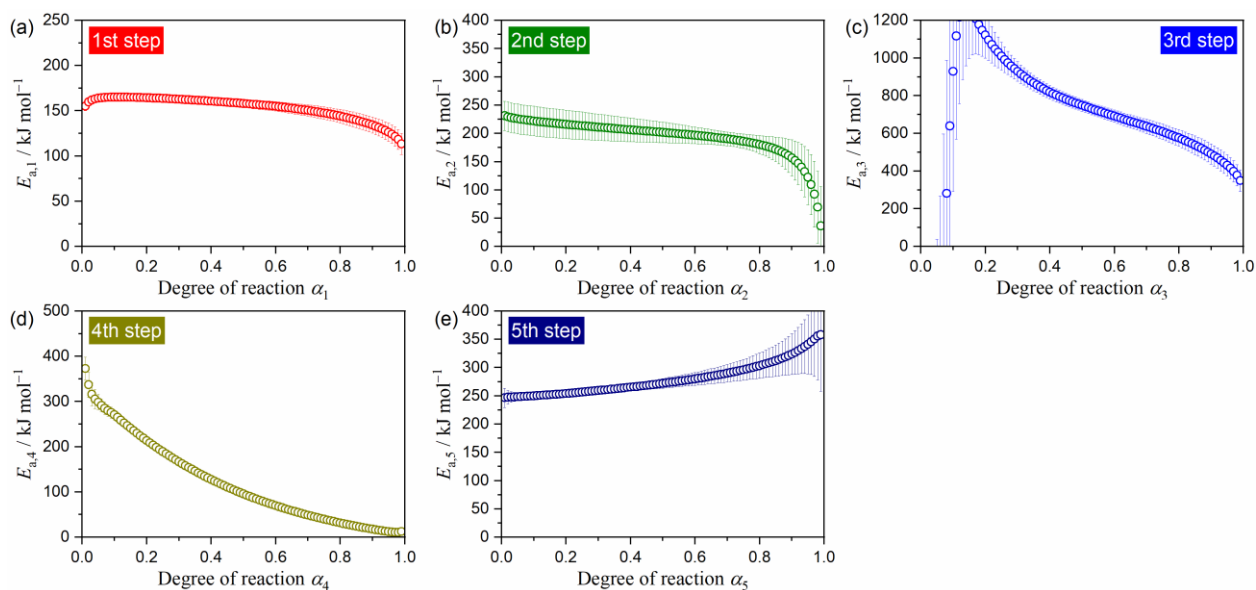

**Figure S36.**  $E_{a,i}$  values at various  $\alpha_i$  for each step of the multistep thermal dehydration of DCPD (63–75  $\mu\text{m}$ ) in a stream of  $\text{N}_2\text{-H}_2\text{O}$  mixed gas with  $p(\text{H}_2\text{O}) = 2.9$  kPa: (a) first, (b) second, (c) third, (d) fourth, and (e) fifth steps.

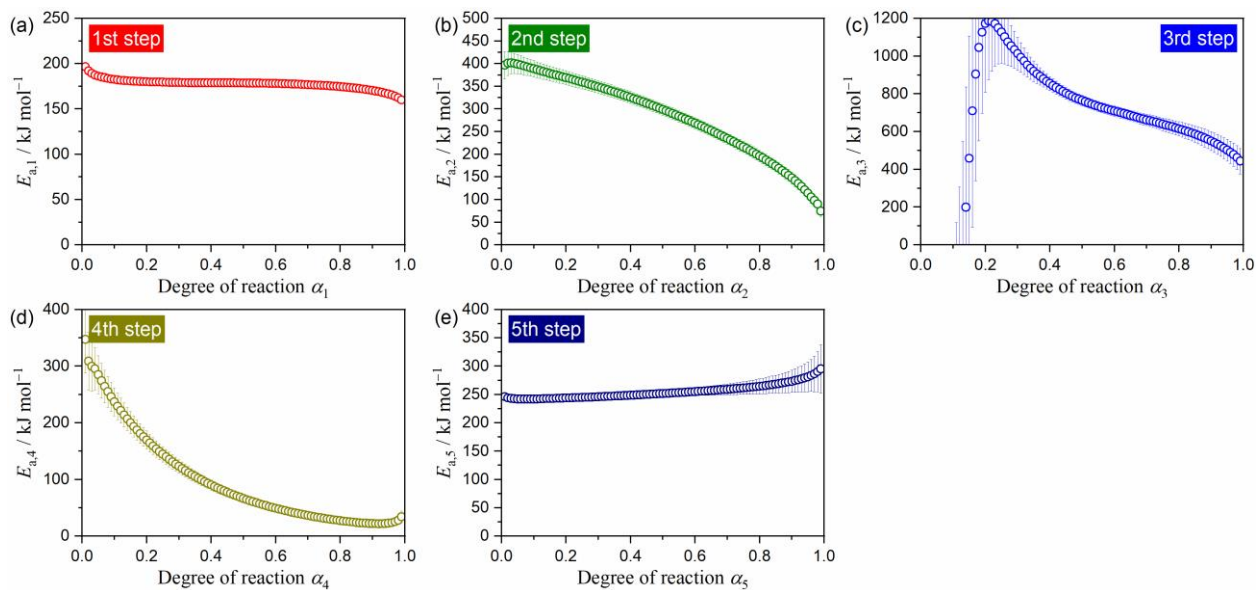

**Figure S37.**  $E_{a,i}$  values at various  $\alpha_i$  for each step of the multistep thermal dehydration of DCPD (63–75  $\mu\text{m}$ ) in a stream of  $\text{N}_2\text{-H}_2\text{O}$  mixed gas with  $p(\text{H}_2\text{O}) = 6.3$  kPa: (a) first, (b) second, (c) third, (d) fourth, and (e) fifth steps.

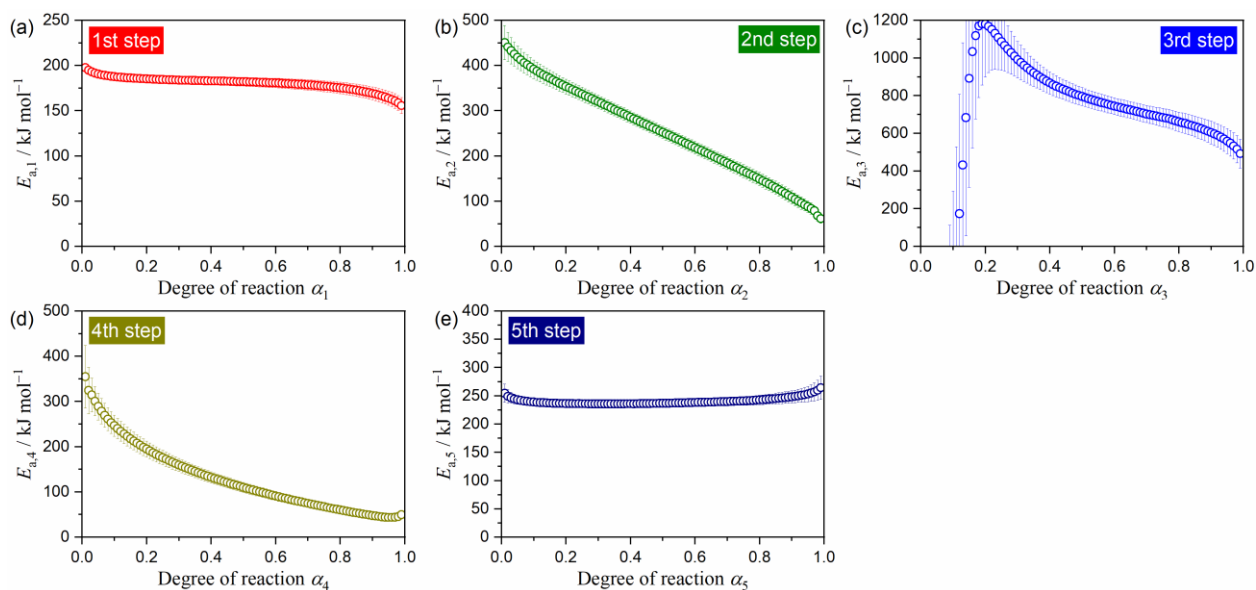

**Figure S38.**  $E_{a,i}$  values at various  $\alpha_i$  for each step of the multistep thermal dehydration of DCPD (63–75  $\mu\text{m}$ ) in a stream of  $\text{N}_2\text{-H}_2\text{O}$  mixed gas with  $p(\text{H}_2\text{O}) = 8.1$  kPa: (a) first, (b) second, (c) third, (d) fourth, and (e) fifth steps.

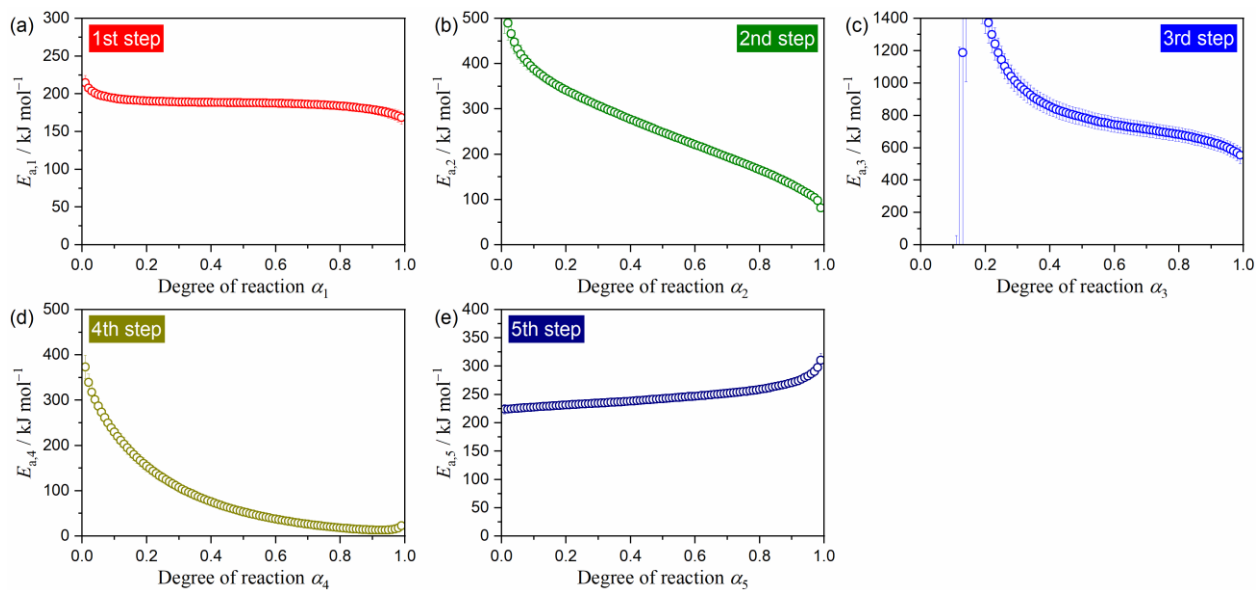

**Figure S39.**  $E_{a,i}$  values at various  $\alpha_i$  for each step of the multistep thermal dehydration of DCPD (63–75  $\mu\text{m}$ ) in a stream of  $\text{N}_2$ – $\text{H}_2\text{O}$  mixed gas with  $p(\text{H}_2\text{O}) = 10.2$  kPa: (a) first, (b) second, (c) third, (d) fourth, and (e) fifth steps.

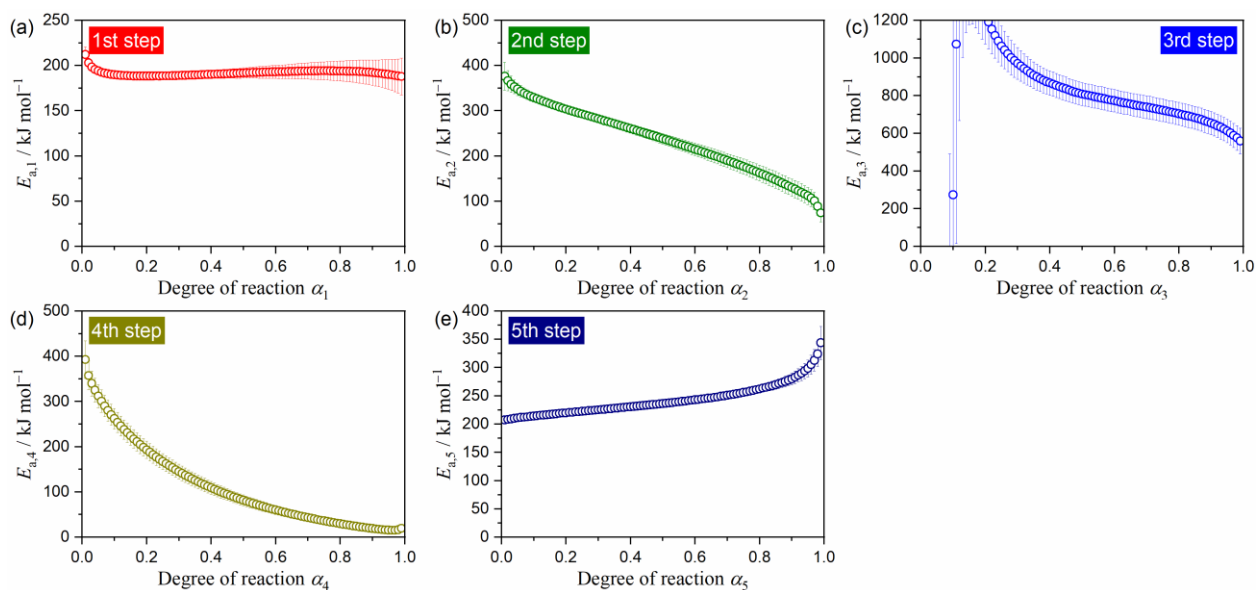

**Figure S40.**  $E_{a,i}$  values at various  $\alpha_i$  for each step of the multistep thermal dehydration of DCPD (63–75  $\mu\text{m}$ ) in a stream of  $\text{N}_2$ – $\text{H}_2\text{O}$  mixed gas with  $p(\text{H}_2\text{O}) = 12.6$  kPa: (a) first, (b) second, (c) third, (d) fourth, and (e) fifth steps.

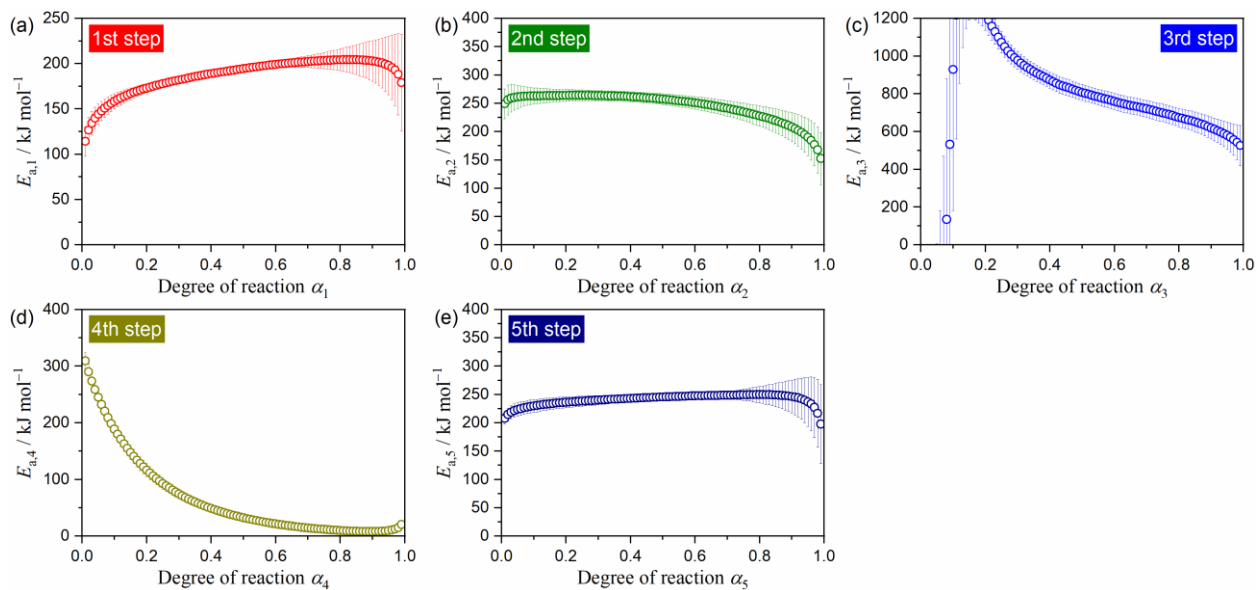

**Figure S41.**  $E_{a,i}$  values at various  $\alpha_i$  for each step of the multistep thermal dehydration of DCPD (63–75  $\mu\text{m}$ ) in a stream of  $\text{N}_2\text{--H}_2\text{O}$  mixed gas with  $p(\text{H}_2\text{O}) = 15.8$  kPa: (a) first, (b) second, (c) third, (d) fourth, and (e) fifth steps.

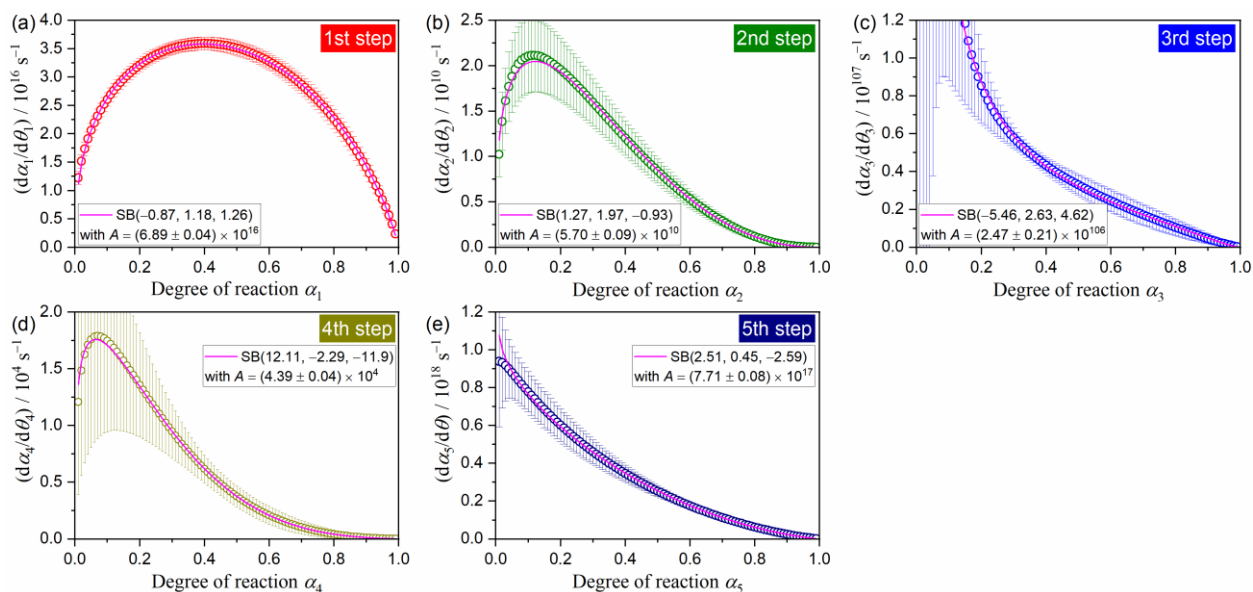

**Figure S42.** Experimental master plots for each step of the multistep thermal dehydration of DCPD (63–75  $\mu\text{m}$ ) in a stream of  $\text{N}_2\text{--H}_2\text{O}$  mixed gas with  $p(\text{H}_2\text{O}) = 1.2$  kPa: (a) first, (b) second, (c) third, (d) fourth, and (e) fifth steps.

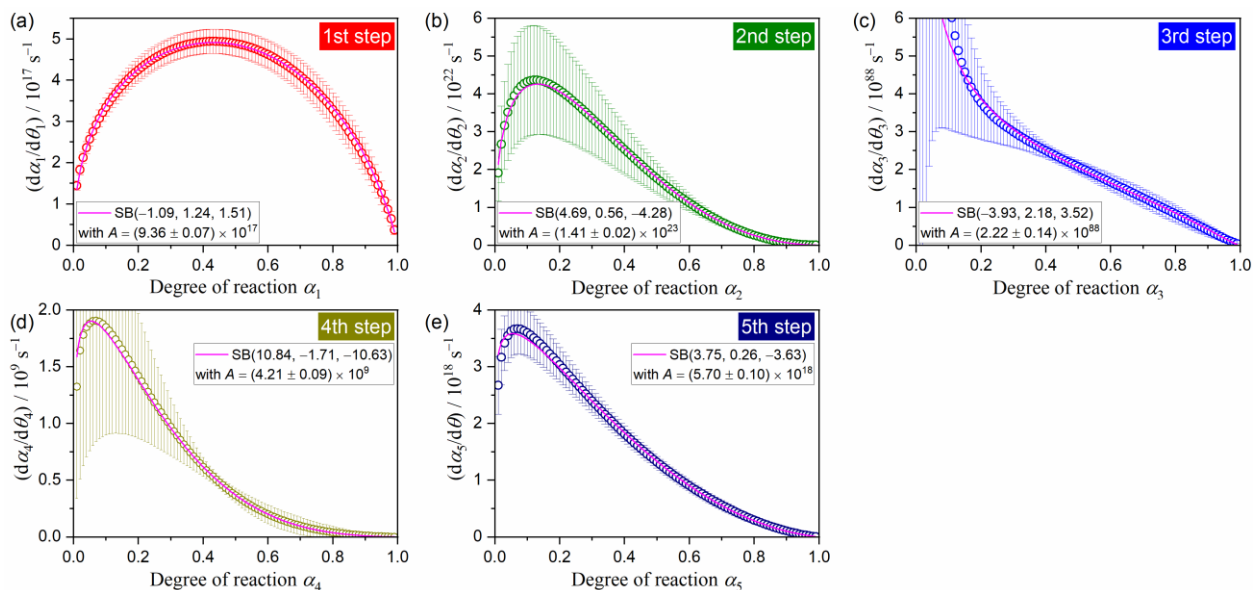

**Figure S43.** Experimental master plots for each step of the multistep thermal dehydration of DCPD (63–75  $\mu\text{m}$ ) in a stream of  $\text{N}_2\text{--H}_2\text{O}$  mixed gas with  $p(\text{H}_2\text{O}) = 2.9 \text{ kPa}$ : (a) first, (b) second, (c) third, (d) fourth, and (e) fifth steps.

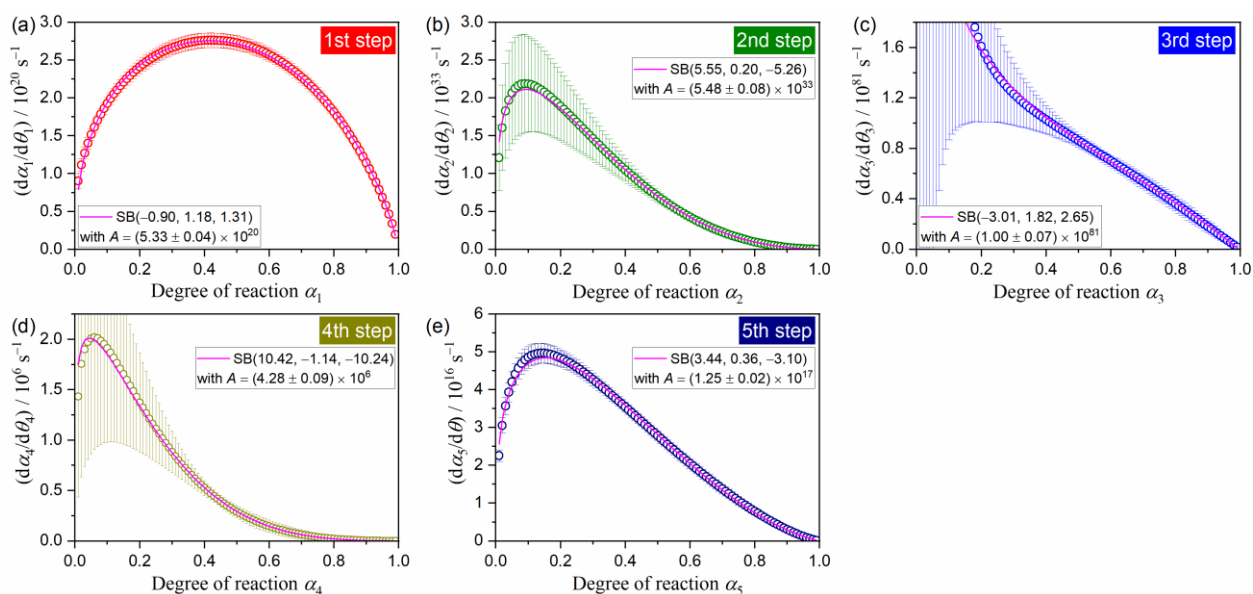

**Figure S44.** Experimental master plots for each step of the multistep thermal dehydration of DCPD (63–75  $\mu\text{m}$ ) in a stream of  $\text{N}_2\text{--H}_2\text{O}$  mixed gas with  $p(\text{H}_2\text{O}) = 6.3 \text{ kPa}$ : (a) first, (b) second, (c) third, (d) fourth, and (e) fifth steps.



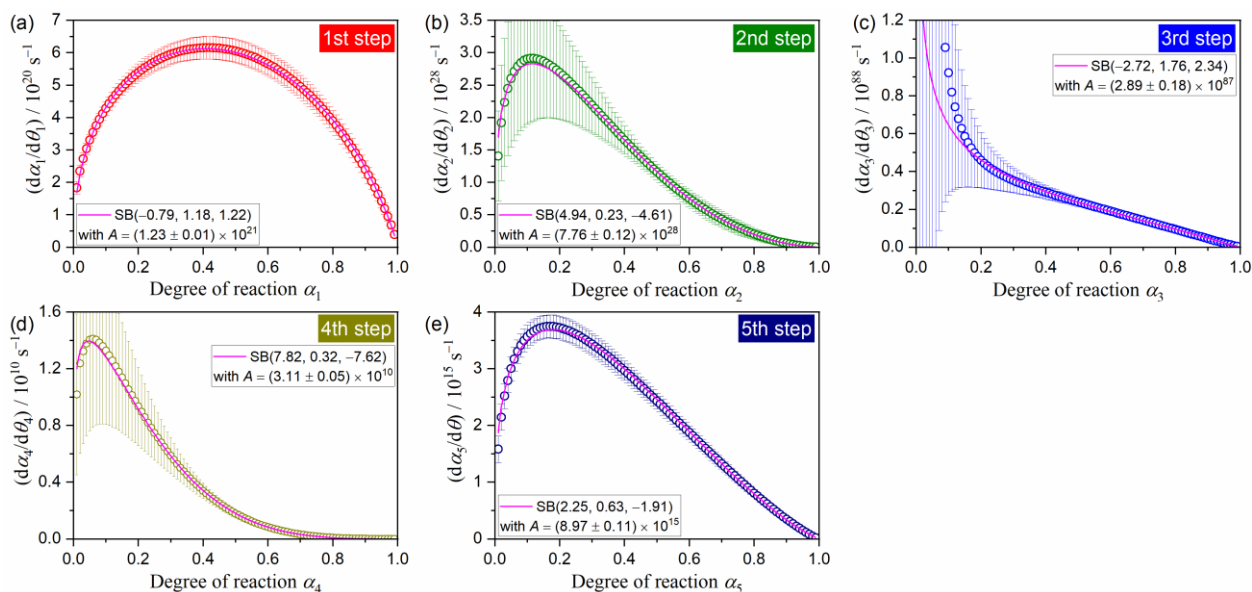

**Figure S45.** Experimental master plots for each step of the multistep thermal dehydration of DCPD (63–75  $\mu\text{m}$ ) in a stream of  $\text{N}_2\text{--H}_2\text{O}$  mixed gas with  $p(\text{H}_2\text{O}) = 8.1$  kPa: (a) first, (b) second, (c) third, (d) fourth, and (e) fifth steps.

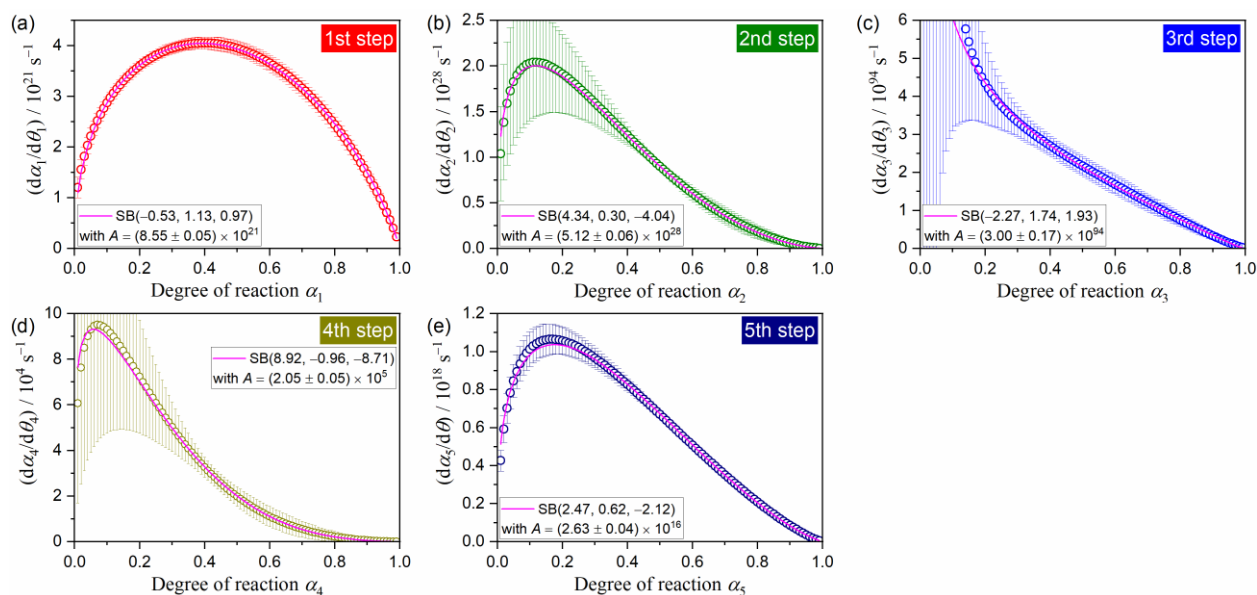

**Figure S46.** Experimental master plots for each step of the multistep thermal dehydration of DCPD (63–75  $\mu\text{m}$ ) in a stream of  $\text{N}_2\text{--H}_2\text{O}$  mixed gas with  $p(\text{H}_2\text{O}) = 10.2$  kPa: (a) first, (b) second, (c) third, (d) fourth, and (e) fifth steps.

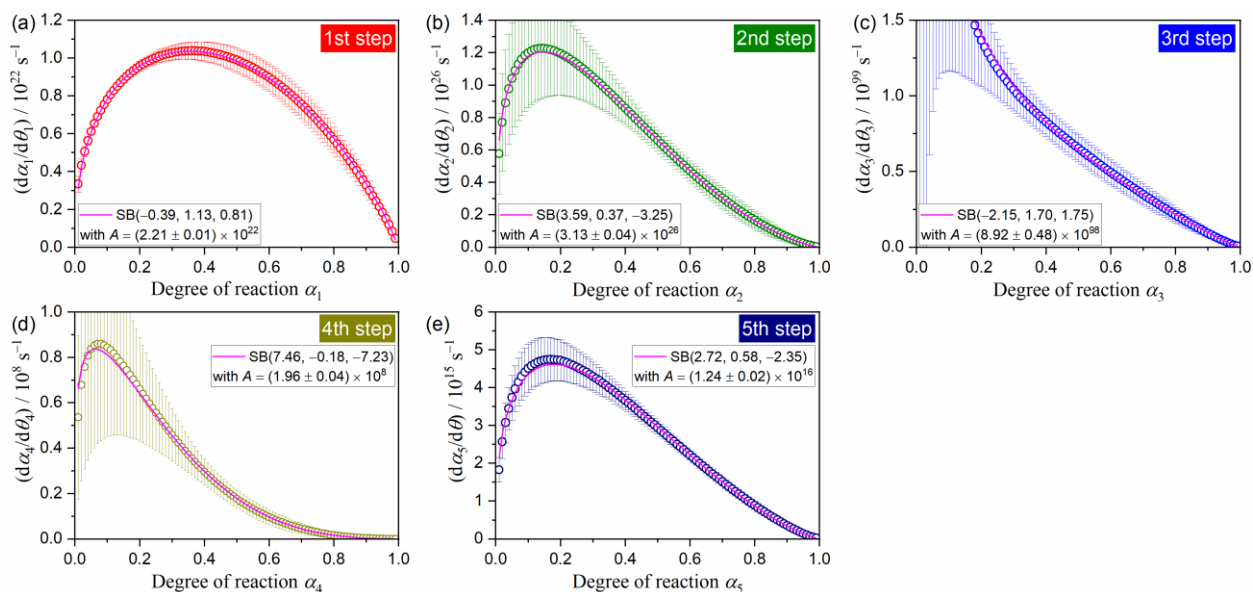

**Figure S47.** Experimental master plots for each step of the multistep thermal dehydration of DCPD (63–75 μm) in a stream of N<sub>2</sub>–H<sub>2</sub>O mixed gas with  $p(\text{H}_2\text{O}) = 12.6$  kPa: (a) first, (b) second, (c) third, (d) fourth, and (e) fifth steps.

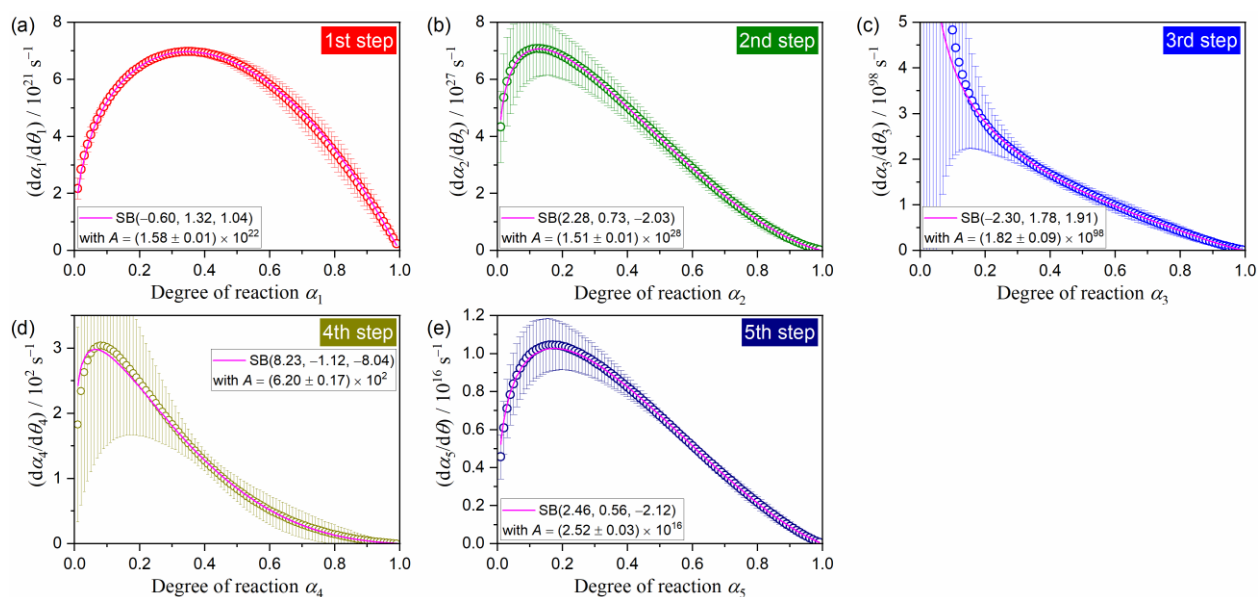

**Figure S48.** Experimental master plots for each step of the multistep thermal dehydration of DCPD (63–75 μm) in a stream of N<sub>2</sub>–H<sub>2</sub>O mixed gas with  $p(\text{H}_2\text{O}) = 15.8$  kPa: (a) first, (b) second, (c) third, (d) fourth, and (e) fifth steps.

## Supplementary Information

**Table S5.** Results of mathematical deconvolution analysis and subsequent formal kinetic analysis for the multistep thermal dehydration of DCPD (63–75  $\mu\text{m}$ ) in a stream of  $\text{N}_2\text{--H}_2\text{O}$  mixed gas with  $p(\text{H}_2\text{O}) = 1.2$  kPa

| <i>i</i> | $E_{a,i}/\text{kJ mol}^{-1},^{\text{a}}$ | $\frac{d\alpha_i}{d\theta_i} = A_i f(\alpha_i)$ with $f(\alpha_i) = \alpha_i^{m_i}(1 - \alpha_i)^{n_i}[-\ln(1 - \alpha_i)]^{p_i}$ |                  |                  |                   |                   |
|----------|------------------------------------------|-----------------------------------------------------------------------------------------------------------------------------------|------------------|------------------|-------------------|-------------------|
|          |                                          | $A_i / \text{s}^{-1}$                                                                                                             | $m_i$            | $n_i$            | $p_i$             | $R^{2, \text{b}}$ |
| 1        | $146.2 \pm 4.5$                          | $(6.89 \pm 0.04) \times 10^{16}$                                                                                                  | $-0.87 \pm 0.07$ | $1.18 \pm 0.03$  | $1.26 \pm 0.06$   | 0.9997            |
| 2        | $101.2 \pm 14.3$                         | $(5.70 \pm 0.09) \times 10^{10}$                                                                                                  | $1.27 \pm 0.16$  | $1.97 \pm 0.06$  | $-0.93 \pm 0.16$  | 0.9996            |
| 3        | $956.6 \pm 477.5$                        | $(2.47 \pm 0.21) \times 10^{106}$                                                                                                 | $-5.46 \pm 0.79$ | $2.63 \pm 0.29$  | $4.62 \pm 0.75$   | 0.9981            |
| 4        | $67.3 \pm 51.8$                          | $(4.39 \pm 0.04) \times 10^4$                                                                                                     | $12.11 \pm 0.15$ | $-2.29 \pm 0.06$ | $-11.87 \pm 0.14$ | 0.9999            |
| 5        | $266.6 \pm 25.0$                         | $(7.71 \pm 0.08) \times 10^{17}$                                                                                                  | $2.51 \pm 0.10$  | $0.45 \pm 0.04$  | $-2.59 \pm 0.10$  | 0.9998            |

<sup>a</sup>Average value over  $0.1 \leq \alpha \leq 0.9$ .

<sup>b</sup>Determination coefficient of the nonlinear least-squares analysis for fitting the experimental master plot.

**Table S6.** Results of mathematical deconvolution analysis and subsequent formal kinetic analysis for the multistep thermal dehydration of DCPD (63–75  $\mu\text{m}$ ) in a stream of  $\text{N}_2\text{--H}_2\text{O}$  mixed gas with  $p(\text{H}_2\text{O}) = 2.9$  kPa

| <i>i</i> | $E_{a,i}/\text{kJ mol}^{-1},^{\text{a}}$ | $\frac{d\alpha_i}{d\theta_i} = A_i f(\alpha_i)$ with $f(\alpha_i) = \alpha_i^{m_i}(1 - \alpha_i)^{n_i}[-\ln(1 - \alpha_i)]^{p_i}$ |                  |                  |                   |                   |
|----------|------------------------------------------|-----------------------------------------------------------------------------------------------------------------------------------|------------------|------------------|-------------------|-------------------|
|          |                                          | $A_i / \text{s}^{-1}$                                                                                                             | $m_i$            | $n_i$            | $p_i$             | $R^{2, \text{b}}$ |
| 1        | $155.6 \pm 8.6$                          | $(9.36 \pm 0.07) \times 10^{17}$                                                                                                  | $-1.09 \pm 0.09$ | $1.24 \pm 0.04$  | $1.51 \pm 0.08$   | 0.9993            |
| 2        | $199.1 \pm 15.5$                         | $(1.41 \pm 0.02) \times 10^{23}$                                                                                                  | $4.69 \pm 0.14$  | $0.56 \pm 0.06$  | $-4.28 \pm 0.14$  | 0.9998            |
| 3        | $797.0 \pm 210.5$                        | $(2.22 \pm 0.14) \times 10^{88}$                                                                                                  | $-3.93 \pm 0.54$ | $2.18 \pm 0.19$  | $3.52 \pm 0.51$   | 0.9985            |
| 4        | $112.1 \pm 73.4$                         | $(4.21 \pm 0.09) \times 10^9$                                                                                                     | $10.84 \pm 0.29$ | $-1.71 \pm 0.12$ | $-10.63 \pm 0.28$ | 0.9996            |
| 5        | $276.2 \pm 20.2$                         | $(5.70 \pm 0.10) \times 10^{18}$                                                                                                  | $3.75 \pm 0.19$  | $0.26 \pm 0.07$  | $-3.63 \pm 0.18$  | 0.9995            |

<sup>a</sup>Average value over  $0.1 \leq \alpha \leq 0.9$ .

<sup>b</sup>Determination coefficient of the nonlinear least-squares analysis for fitting the experimental master plot.

**Table S7.** Results of mathematical deconvolution analysis and subsequent formal kinetic analysis for the multistep thermal dehydration of DCPD (63–75  $\mu\text{m}$ ) in a stream of  $\text{N}_2\text{--H}_2\text{O}$  mixed gas with  $p(\text{H}_2\text{O}) = 6.3$  kPa

| <i>i</i> | $E_{a,i}/\text{kJ mol}^{-1},^{\text{a}}$ | $\frac{d\alpha_i}{d\theta_i} = A_i f(\alpha_i)$ with $f(\alpha_i) = \alpha_i^{m_i}(1 - \alpha_i)^{n_i}[-\ln(1 - \alpha_i)]^{p_i}$ |                  |                  |                   |                   |
|----------|------------------------------------------|-----------------------------------------------------------------------------------------------------------------------------------|------------------|------------------|-------------------|-------------------|
|          |                                          | $A_i / \text{s}^{-1}$                                                                                                             | $m_i$            | $n_i$            | $p_i$             | $R^{2, \text{b}}$ |
| 1        | $177.8 \pm 2.6$                          | $(5.33 \pm 0.04) \times 10^{20}$                                                                                                  | $-0.90 \pm 0.07$ | $1.18 \pm 0.03$  | $1.31 \pm 0.06$   | 0.9996            |
| 2        | $288.7 \pm 69.1$                         | $(5.48 \pm 0.08) \times 10^{33}$                                                                                                  | $5.54 \pm 0.17$  | $0.20 \pm 0.07$  | $-5.26 \pm 0.16$  | 0.9998            |
| 3        | $731.8 \pm 293.3$                        | $(1.00 \pm 0.07) \times 10^{81}$                                                                                                  | $-3.01 \pm 0.46$ | $1.82 \pm 0.15$  | $2.65 \pm 0.42$   | 0.9987            |
| 4        | $86.2 \pm 60.1$                          | $(4.28 \pm 0.09) \times 10^6$                                                                                                     | $10.41 \pm 0.29$ | $-1.14 \pm 0.12$ | $-10.22 \pm 0.28$ | 0.9995            |
| 5        | $253.2 \pm 8.6$                          | $(1.25 \pm 0.02) \times 10^{17}$                                                                                                  | $3.43 \pm 0.19$  | $0.36 \pm 0.08$  | $-3.09 \pm 0.19$  | 0.9995            |

<sup>a</sup>Average value over  $0.1 \leq \alpha \leq 0.9$ .

<sup>b</sup>Determination coefficient of the nonlinear least-squares analysis for fitting the experimental master plot.

## Supplementary Information

**Table S8.** Results of mathematical deconvolution analysis and subsequent formal kinetic analysis for the multistep thermal dehydration of DCPD (63–75 μm) in a stream of N<sub>2</sub>–H<sub>2</sub>O mixed gas with  $p(\text{H}_2\text{O}) = 8.1$  kPa

| <i>i</i> | $E_{a,i}/\text{kJ mol}^{-1},^a$ | $\frac{d\alpha_i}{d\theta_i} = A_i f(\alpha_i)$ with $f(\alpha_i) = \alpha_i^{m_i}(1 - \alpha_i)^{n_i}[-\ln(1 - \alpha_i)]^{p_i}$ |              |             |              |           |
|----------|---------------------------------|-----------------------------------------------------------------------------------------------------------------------------------|--------------|-------------|--------------|-----------|
|          |                                 | $A_i / \text{s}^{-1}$                                                                                                             | $m_i$        | $n_i$       | $p_i$        | $R^{2,b}$ |
| 1        | 180.9 ± 4.4                     | $(1.23 \pm 0.01) \times 10^{21}$                                                                                                  | -0.79 ± 0.07 | 1.18 ± 0.03 | 1.22 ± 0.06  | 0.9997    |
| 2        | 251.6 ± 81.0                    | $(7.76 \pm 0.12) \times 10^{28}$                                                                                                  | 4.94 ± 0.15  | 0.23 ± 0.06 | -4.61 ± 0.15 | 0.9998    |
| 3        | 788.0 ± 233.0                   | $(2.89 \pm 0.18) \times 10^{87}$                                                                                                  | -2.72 ± 0.41 | 1.76 ± 0.14 | 2.34 ± 0.38  | 0.9985    |
| 4        | 121.0 ± 54.8                    | $(3.11 \pm 0.05) \times 10^{10}$                                                                                                  | 7.82 ± 0.15  | 0.32 ± 0.06 | -7.62 ± 0.15 | 0.9997    |
| 5        | 238.6 ± 3.2                     | $(8.97 \pm 0.11) \times 10^{15}$                                                                                                  | 2.25 ± 0.11  | 0.63 ± 0.04 | -1.91 ± 0.11 | 0.9997    |

<sup>a</sup>Average value over  $0.1 \leq \alpha \leq 0.9$ .

<sup>b</sup>Determination coefficient of the nonlinear least-squares analysis for fitting the experimental master plot.

**Table S9.** Results of mathematical deconvolution analysis and subsequent formal kinetic analysis for the multistep thermal dehydration of DCPD (63–75 μm) in a stream of N<sub>2</sub>–H<sub>2</sub>O mixed gas with  $p(\text{H}_2\text{O}) = 10.2$  kPa

| <i>i</i> | $E_{a,i}/\text{kJ mol}^{-1},^a$ | $\frac{d\alpha_i}{d\theta_i} = A_i f(\alpha_i)$ with $f(\alpha_i) = \alpha_i^{m_i}(1 - \alpha_i)^{n_i}[-\ln(1 - \alpha_i)]^{p_i}$ |              |              |              |           |
|----------|---------------------------------|-----------------------------------------------------------------------------------------------------------------------------------|--------------|--------------|--------------|-----------|
|          |                                 | $A_i / \text{s}^{-1}$                                                                                                             | $m_i$        | $n_i$        | $p_i$        | $R^{2,b}$ |
| 1        | 187.6 ± 3.2                     | $(8.55 \pm 0.05) \times 10^{21}$                                                                                                  | -0.53 ± 0.05 | 1.13 ± 0.02  | 0.97 ± 0.05  | 0.9999    |
| 2        | 252.0 ± 70.2                    | $(5.12 \pm 0.06) \times 10^{28}$                                                                                                  | 4.34 ± 0.12  | 0.30 ± 0.05  | -4.04 ± 0.12 | 0.9999    |
| 3        | 848.4 ± 459.1                   | $(3.00 \pm 0.17) \times 10^{94}$                                                                                                  | -2.27 ± 0.39 | 1.74 ± 0.13  | 1.93 ± 0.36  | 0.9987    |
| 4        | 73.9 ± 58.8                     | $(2.05 \pm 0.05) \times 10^5$                                                                                                     | 8.90 ± 0.27  | -0.95 ± 0.11 | -8.70 ± 0.27 | 0.9995    |
| 5        | 244.2 ± 11.4                    | $(2.63 \pm 0.04) \times 10^{16}$                                                                                                  | 2.47 ± 0.13  | 0.62 ± 0.05  | -2.12 ± 0.12 | 0.9998    |

<sup>a</sup>Average value over  $0.1 \leq \alpha \leq 0.9$ .

<sup>b</sup>Determination coefficient of the nonlinear least-squares analysis for fitting the experimental master plot.

**Table S10.** Results of mathematical deconvolution analysis and subsequent formal kinetic analysis for the multistep thermal dehydration of DCPD (63–75 μm) in a stream of N<sub>2</sub>–H<sub>2</sub>O mixed gas with  $p(\text{H}_2\text{O}) = 12.6$  kPa

| <i>i</i> | $E_{a,i}/\text{kJ mol}^{-1},^a$ | $\frac{d\alpha_i}{d\theta_i} = A_i f(\alpha_i)$ with $f(\alpha_i) = \alpha_i^{m_i}(1 - \alpha_i)^{n_i}[-\ln(1 - \alpha_i)]^{p_i}$ |              |              |              |           |
|----------|---------------------------------|-----------------------------------------------------------------------------------------------------------------------------------|--------------|--------------|--------------|-----------|
|          |                                 | $A_i / \text{s}^{-1}$                                                                                                             | $m_i$        | $n_i$        | $p_i$        | $R^{2,b}$ |
| 1        | 191.4 ± 2.2                     | $(2.21 \pm 0.01) \times 10^{22}$                                                                                                  | -0.39 ± 0.05 | 1.13 ± 0.02  | 0.81 ± 0.05  | 0.9999    |
| 2        | 235.2 ± 56.1                    | $(3.13 \pm 0.04) \times 10^{26}$                                                                                                  | 3.59 ± 0.10  | 0.37 ± 0.04  | -3.25 ± 0.10 | 0.9999    |
| 3        | 887.1 ± 245.1                   | $(8.92 \pm 0.48) \times 10^{98}$                                                                                                  | -2.15 ± 0.39 | 1.70 ± 0.13  | 1.75 ± 0.36  | 0.9984    |
| 4        | 100.0 ± 67.6                    | $(1.96 \pm 0.04) \times 10^8$                                                                                                     | 7.46 ± 0.23  | -0.18 ± 0.09 | -7.23 ± 0.23 | 0.9994    |
| 5        | 239.3 ± 17.3                    | $(1.24 \pm 0.02) \times 10^{16}$                                                                                                  | 2.72 ± 0.14  | 0.58 ± 0.05  | -2.35 ± 0.13 | 0.9997    |

<sup>a</sup>Average value over  $0.1 \leq \alpha \leq 0.9$ .

<sup>b</sup>Determination coefficient of the nonlinear least-squares analysis for fitting the experimental master plot.

**Table S11.** Results of mathematical deconvolution analysis and subsequent formal kinetic analysis for the multistep thermal dehydration of DCPD (63–75  $\mu\text{m}$ ) in a stream of  $\text{N}_2\text{-H}_2\text{O}$  mixed gas with  $p(\text{H}_2\text{O}) = 15.8$  kPa

| $i$ | $E_{a,i}/\text{kJ mol}^{-1},^a$ | $\frac{d\alpha_i}{d\theta_i} = A_i f(\alpha_i)$ with $f(\alpha_i) = \alpha_i^{m_i} (1 - \alpha_i)^{n_i} [-\ln(1 - \alpha_i)]^{p_i}$ |                  |                  |                  |          |
|-----|---------------------------------|-------------------------------------------------------------------------------------------------------------------------------------|------------------|------------------|------------------|----------|
|     |                                 | $A_i / \text{s}^{-1}$                                                                                                               | $m_i$            | $n_i$            | $p_i$            | $R^2,^b$ |
| 1   | $190.7 \pm 13.1$                | $(1.58 \pm 0.01) \times 10^{22}$                                                                                                    | $-0.60 \pm 0.09$ | $1.32 \pm 0.04$  | $1.04 \pm 0.09$  | 0.9998   |
| 2   | $250.3 \pm 16.0$                | $(1.51 \pm 0.01) \times 10^{28}$                                                                                                    | $2.28 \pm 0.04$  | $0.73 \pm 0.02$  | $-2.03 \pm 0.04$ | 0.9999   |
| 3   | $880.5 \pm 224.0$               | $(1.82 \pm 0.09) \times 10^{98}$                                                                                                    | $-2.30 \pm 0.36$ | $1.78 \pm 0.13$  | $1.91 \pm 0.34$  | 0.9993   |
| 4   | $51.6 \pm 48.1$                 | $(6.20 \pm 0.17) \times 10^2$                                                                                                       | $8.23 \pm 0.32$  | $-1.12 \pm 0.12$ | $-8.04 \pm 0.31$ | 0.9993   |
| 5   | $243.7 \pm 5.6$                 | $(2.52 \pm 0.03) \times 10^{16}$                                                                                                    | $2.46 \pm 0.09$  | $0.56 \pm 0.04$  | $-2.12 \pm 0.09$ | 0.9999   |

<sup>a</sup>Average value over  $0.1 \leq \alpha \leq 0.9$ .<sup>b</sup>Determination coefficient of the nonlinear least-squares analysis for fitting the experimental master plot.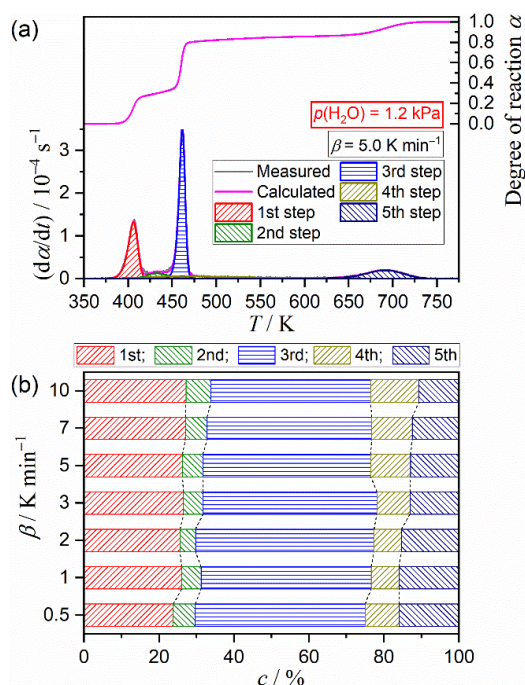**Figure S49.** Results of KDA for the multistep thermal dehydration of DCPD (63–75  $\mu\text{m}$ ) in a stream of  $\text{N}_2\text{-H}_2\text{O}$  mixed gas with  $p(\text{H}_2\text{O}) = 1.2$  kPa: (a) typical fitting results for the overall reaction under linear nonisothermal conditions at a  $\beta$  of 5  $\text{K min}^{-1}$  and (b) contributions of individual steps at various  $\beta$  values.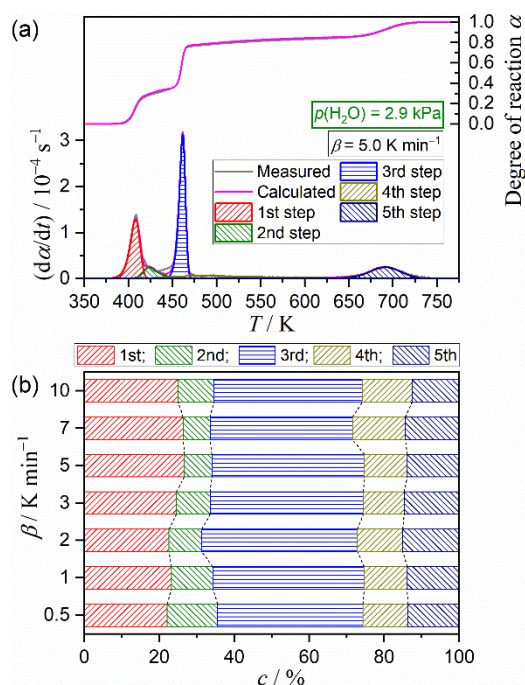**Figure S50.** Results of KDA for the multistep thermal dehydration of DCPD (63–75  $\mu\text{m}$ ) in a stream of  $\text{N}_2\text{-H}_2\text{O}$  mixed gas with  $p(\text{H}_2\text{O}) = 2.9$  kPa: (a) typical fitting results for the overall reaction under linear nonisothermal conditions at a  $\beta$  of 5  $\text{K min}^{-1}$  and (b) contributions of individual steps at various  $\beta$  values.

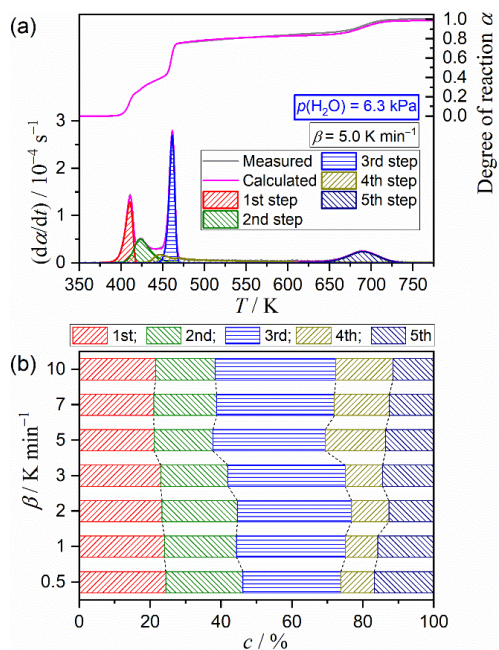

**Figure S51.** Results of KDA for the multistep thermal dehydration of DCPD (63–75  $\mu\text{m}$ ) in a stream of  $\text{N}_2$ – $\text{H}_2\text{O}$  mixed gas with  $p(\text{H}_2\text{O}) = 6.3$  kPa: (a) typical fitting results for the overall reaction under linear nonisothermal conditions at a  $\beta$  of 5  $\text{K min}^{-1}$  and (b) contributions of individual steps at various  $\beta$  values.

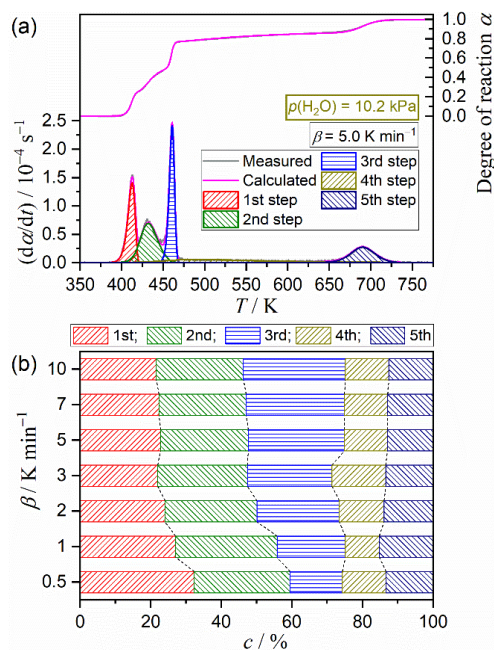

**Figure S53.** Results of KDA for the multistep thermal dehydration of DCPD (63–75  $\mu\text{m}$ ) in a stream of  $\text{N}_2$ – $\text{H}_2\text{O}$  mixed gas with  $p(\text{H}_2\text{O}) = 10.2$  kPa: (a) typical fitting results for the overall reaction under linear nonisothermal conditions at a  $\beta$  of 5  $\text{K min}^{-1}$  and (b) contributions of individual steps at various  $\beta$  values.

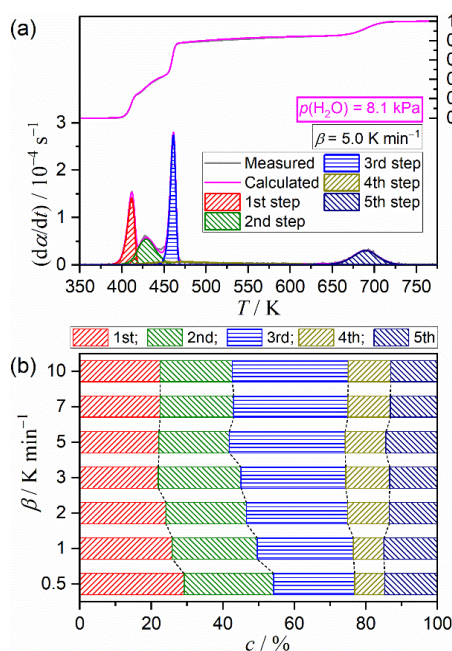

**Figure S52.** Results of KDA for the multistep thermal dehydration of DCPD (63–75  $\mu\text{m}$ ) in a stream of  $\text{N}_2$ – $\text{H}_2\text{O}$  mixed gas with  $p(\text{H}_2\text{O}) = 8.1$  kPa: (a) typical fitting results for the overall reaction under linear nonisothermal conditions at a  $\beta$  of 5  $\text{K min}^{-1}$  and (b) contributions of individual steps at various  $\beta$  values.

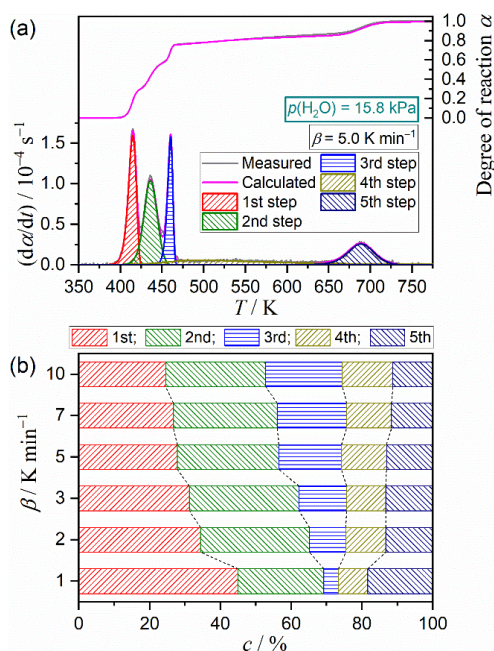

**Figure S54.** Results of KDA for the multistep thermal dehydration of DCPD (63–75  $\mu\text{m}$ ) in a stream of  $\text{N}_2$ – $\text{H}_2\text{O}$  mixed gas with  $p(\text{H}_2\text{O}) = 15.8$  kPa: (a) typical fitting results for the overall reaction under linear nonisothermal conditions at a  $\beta$  of 5  $\text{K min}^{-1}$  and (b) contributions of individual steps at various  $\beta$  values.

**Table S12.** Optimized kinetic parameters for each reaction step of the partially overlapping five-step mass loss process of the thermal dehydration of DCPD (63–75  $\mu\text{m}$ ) in a stream of  $\text{N}_2\text{--H}_2\text{O}$  mixed gas with  $p(\text{H}_2\text{O}) = 1.2$  kPa, averaged over different  $\beta$  values

| $i$ | $c_i$             | $E_{a,i} / \text{kJ mol}^{-1}$ | $A_i / \text{s}^{-1}$            | SB( $m_i, n_i, p_i$ ) |                  |                  | $R^2, ^a$           |
|-----|-------------------|--------------------------------|----------------------------------|-----------------------|------------------|------------------|---------------------|
|     |                   |                                |                                  | $m_i$                 | $n_i$            | $p_i$            |                     |
| 1   |                   | $145.8 \pm 0.3$                | $(6.85 \pm 0.02) \times 10^{16}$ | $-0.92 \pm 0.03$      | $1.42 \pm 0.08$  | $1.34 \pm 0.03$  | $0.9973 \pm 0.0024$ |
| 2   | $0.77 \pm 0.02^b$ | $204.5 \pm 2.7$                | $(1.37 \pm 0.04) \times 10^{23}$ | $1.13 \pm 0.14$       | $2.04 \pm 0.11$  | $-0.88 \pm 0.08$ |                     |
| 3   |                   | $795.7 \pm 0.5$                | $(2.03 \pm 0.07) \times 10^{88}$ | $-4.68 \pm 0.19$      | $2.78 \pm 0.12$  | $4.40 \pm 0.28$  |                     |
| 4   | $0.10 \pm 0.03$   | $146.7 \pm 5.6$                | $(2.25 \pm 0.01) \times 10^{14}$ | $21.7 \pm 0.27$       | $-3.24 \pm 0.07$ | $-21.9 \pm 0.63$ |                     |
| 5   | $0.14 \pm 0.03$   | $267.0 \pm 0.6$                | $(7.68 \pm 0.08) \times 10^{17}$ | $2.44 \pm 0.09$       | $0.44 \pm 0.05$  | $-2.58 \pm 0.13$ |                     |

<sup>a</sup> Determination coefficient of the nonlinear least-squares analysis of the KDA.<sup>b</sup>  $c_1 + c_2 + c_3$ .**Table S13.** Optimized kinetic parameters for each reaction step of the partially overlapping five-step mass loss process of the thermal dehydration of DCPD (63–75  $\mu\text{m}$ ) in a stream of  $\text{N}_2\text{--H}_2\text{O}$  mixed gas with  $p(\text{H}_2\text{O}) = 2.9$  kPa, averaged over different  $\beta$  values

| $i$ | $c_i$             | $E_{a,i} / \text{kJ mol}^{-1}$ | $A_i / \text{s}^{-1}$            | SB( $m_i, n_i, p_i$ ) |                  |                  | $R^2, ^a$           |
|-----|-------------------|--------------------------------|----------------------------------|-----------------------|------------------|------------------|---------------------|
|     |                   |                                |                                  | $m_i$                 | $n_i$            | $p_i$            |                     |
| 1   |                   | $155.2 \pm 0.5$                | $(9.07 \pm 0.40) \times 10^{17}$ | $-1.03 \pm 0.07$      | $1.33 \pm 0.11$  | $1.46 \pm 0.05$  | $0.9973 \pm 0.0025$ |
| 2   | $0.74 \pm 0.02^b$ | $199.6 \pm 1.9$                | $(1.40 \pm 0.01) \times 10^{23}$ | $5.06 \pm 0.16$       | $0.58 \pm 0.01$  | $-4.51 \pm 0.08$ |                     |
| 3   |                   | $795.7 \pm 0.4$                | $(2.18 \pm 0.03) \times 10^{88}$ | $-3.73 \pm 0.10$      | $2.44 \pm 0.19$  | $3.56 \pm 0.11$  |                     |
| 4   | $0.12 \pm 0.02$   | $143.4 \pm 8.9$                | $(2.22 \pm 0.04) \times 10^{14}$ | $22.3 \pm 0.54$       | $-3.27 \pm 0.03$ | $-22.0 \pm 0.34$ |                     |
| 5   | $0.14 \pm 0.01$   | $277.4 \pm 1.0$                | $(5.71 \pm 0.01) \times 10^{18}$ | $2.97 \pm 0.08$       | $0.33 \pm 0.01$  | $-2.94 \pm 0.08$ |                     |

<sup>a</sup> Determination coefficient of the nonlinear least-squares analysis of the KDA.<sup>b</sup>  $c_1 + c_2 + c_3$ .

**Table S14.** Optimized kinetic parameters for each reaction step of the partially overlapping five-step mass loss process of the thermal dehydration of DCPD (63–75  $\mu\text{m}$ ) in a stream of  $\text{N}_2\text{--H}_2\text{O}$  mixed gas with  $p(\text{H}_2\text{O}) = 6.3$  kPa, averaged over different  $\beta$  values

| $i$ | $c_i$             | $E_{a,i} / \text{kJ mol}^{-1}$ | $A_i / \text{s}^{-1}$            | SB( $m_i, n_i, p_i$ ) |                  |                  | $R^2, ^a$           |
|-----|-------------------|--------------------------------|----------------------------------|-----------------------|------------------|------------------|---------------------|
|     |                   |                                |                                  | $m_i$                 | $n_i$            | $p_i$            |                     |
| 1   |                   | $177.6 \pm 0.6$                | $(4.98 \pm 0.61) \times 10^{20}$ | $-0.99 \pm 0.13$      | $1.19 \pm 0.05$  | $1.37 \pm 0.13$  | $0.9970 \pm 0.0042$ |
| 2   | $0.74 \pm 0.03^b$ | $240.6 \pm 2.1$                | $(5.36 \pm 0.16) \times 10^{27}$ | $5.70 \pm 0.13$       | $0.20 \pm 0.01$  | $-5.41 \pm 0.17$ |                     |
| 3   |                   | $800.5 \pm 0.6$                | $(9.42 \pm 0.88) \times 10^{88}$ | $-2.65 \pm 0.28$      | $2.09 \pm 0.14$  | $2.57 \pm 0.35$  |                     |
| 4   | $0.13 \pm 0.04$   | $144.4 \pm 9.7$                | $(4.13 \pm 0.20) \times 10^{14}$ | $20.52 \pm 1.32$      | $-1.17 \pm 2.31$ | $-20.0 \pm 1.57$ |                     |
| 5   | $0.14 \pm 0.02$   | $253.9 \pm 0.7$                | $(1.25 \pm 0.01) \times 10^{17}$ | $3.28 \pm 0.29$       | $0.37 \pm 0.02$  | $-3.00 \pm 0.23$ |                     |

<sup>a</sup> Determination coefficient of the nonlinear least-squares analysis of the KDA.<sup>b</sup>  $c_1 + c_2 + c_3$ .**Table S15.** Optimized kinetic parameters for each reaction step of the partially overlapping five-step mass loss process of the thermal dehydration of DCPD (63–75  $\mu\text{m}$ ) in a stream of  $\text{N}_2\text{--H}_2\text{O}$  mixed gas with  $p(\text{H}_2\text{O}) = 8.1$  kPa, averaged over different  $\beta$  values

| $i$ | $c_i$             | $E_{a,i} / \text{kJ mol}^{-1}$ | $A_i / \text{s}^{-1}$            | SB( $m_i, n_i, p_i$ ) |                  |                   | $R^2, ^a$           |
|-----|-------------------|--------------------------------|----------------------------------|-----------------------|------------------|-------------------|---------------------|
|     |                   |                                |                                  | $m_i$                 | $n_i$            | $p_i$             |                     |
| 1   |                   | $178.8 \pm 2.9$                | $(8.25 \pm 5.00) \times 10^{20}$ | $-0.80 \pm 0.02$      | $1.18 \pm 0.04$  | $1.20 \pm 0.03$   | $0.9947 \pm 0.0057$ |
| 2   | $0.75 \pm 0.02^b$ | $252.9 \pm 0.6$                | $(7.73 \pm 0.03) \times 10^{28}$ | $4.93 \pm 0.23$       | $0.24 \pm 0.01$  | $-4.80 \pm 0.22$  |                     |
| 3   |                   | $787.5 \pm 0.5$                | $(2.86 \pm 0.03) \times 10^{87}$ | $-2.65 \pm 0.08$      | $1.90 \pm 0.16$  | $2.43 \pm 0.08$   |                     |
| 4   | $0.11 \pm 0.02$   | $156.2 \pm 6.0$                | $(4.26 \pm 0.02) \times 10^{14}$ | $21.20 \pm 0.13$      | $-3.01 \pm 0.01$ | $-21.63 \pm 0.21$ |                     |
| 5   | $0.14 \pm 0.01$   | $239.1 \pm 0.6$                | $(8.96 \pm 0.01) \times 10^{15}$ | $2.24 \pm 0.03$       | $0.63 \pm 0.01$  | $-1.93 \pm 0.03$  |                     |

<sup>a</sup> Determination coefficient of the nonlinear least-squares analysis of the KDA.<sup>b</sup>  $c_1 + c_2 + c_3$ .



**Table S16.** Optimized kinetic parameters for each reaction step of the partially overlapping five-step mass loss process of the thermal dehydration of DCPD (63–75  $\mu\text{m}$ ) in a stream of  $\text{N}_2\text{--H}_2\text{O}$  mixed gas with  $p(\text{H}_2\text{O}) = 10.2$  kPa, averaged over different  $\beta$  values

| $i$ | $c_i$             | $E_{a,i} / \text{kJ mol}^{-1}$ | $A_i / \text{s}^{-1}$            | SB( $m_i, n_i, p_i$ ) |                  |                   | $R^2, ^a$           |
|-----|-------------------|--------------------------------|----------------------------------|-----------------------|------------------|-------------------|---------------------|
|     |                   |                                |                                  | $m_i$                 | $n_i$            | $p_i$             |                     |
| 1   |                   | $187.5 \pm 0.3$                | $(8.38 \pm 0.42) \times 10^{21}$ | $-0.53 \pm 0.02$      | $1.16 \pm 0.11$  | $0.96 \pm 0.02$   | $0.9937 \pm 0.0081$ |
| 2   | $0.74 \pm 0.02^b$ | $253.1 \pm 0.4$                | $(5.11 \pm 0.01) \times 10^{28}$ | $4.43 \pm 0.09$       | $0.30 \pm 0.01$  | $-4.32 \pm 0.19$  |                     |
| 3   |                   | $847.9 \pm 0.5$                | $(2.98 \pm 0.03) \times 10^{94}$ | $-2.20 \pm 0.07$      | $1.88 \pm 0.11$  | $2.02 \pm 0.17$   |                     |
| 4   | $0.12 \pm 0.02$   | $161.2 \pm 2.1$                | $(4.28 \pm 0.01) \times 10^{14}$ | $20.99 \pm 0.16$      | $-3.02 \pm 0.02$ | $-21.73 \pm 0.16$ |                     |
| 5   | $0.13 \pm 0.01$   | $244.7 \pm 0.9$                | $(2.63 \pm 0.01) \times 10^{16}$ | $2.44 \pm 0.05$       | $0.62 \pm 0.01$  | $-2.14 \pm 0.05$  |                     |

<sup>a</sup> Determination coefficient of the nonlinear least-squares analysis of the KDA.<sup>b</sup>  $c_1 + c_2 + c_3$ .**Table S17.** Optimized kinetic parameters for each reaction step of the partially overlapping five-step mass loss process of the thermal dehydration of DCPD (63–75  $\mu\text{m}$ ) in a stream of  $\text{N}_2\text{--H}_2\text{O}$  mixed gas with  $p(\text{H}_2\text{O}) = 15.8$  kPa, averaged over different  $\beta$  values

| $i$ | $c_i$             | $E_{a,i} / \text{kJ mol}^{-1}$ | $A_i / \text{s}^{-1}$            | SB( $m_i, n_i, p_i$ ) |                  |                   | $R^2, ^a$           |
|-----|-------------------|--------------------------------|----------------------------------|-----------------------|------------------|-------------------|---------------------|
|     |                   |                                |                                  | $m_i$                 | $n_i$            | $p_i$             |                     |
| 1   |                   | $190.3 \pm 0.4$                | $(1.47 \pm 0.12) \times 10^{22}$ | $-0.09 \pm 0.01$      | $1.13 \pm 0.10$  | $0.52 \pm 0.04$   | $0.9954 \pm 0.0049$ |
| 2   | $0.75 \pm 0.01^b$ | $250.8 \pm 0.4$                | $(1.49 \pm 0.05) \times 10^{28}$ | $2.22 \pm 0.13$       | $0.75 \pm 0.05$  | $-2.13 \pm 0.10$  |                     |
| 3   |                   | $879.9 \pm 0.6$                | $(1.74 \pm 0.16) \times 10^{98}$ | $-2.23 \pm 0.13$      | $1.89 \pm 0.13$  | $1.86 \pm 0.11$   |                     |
| 4   | $0.12 \pm 0.03$   | $164.2 \pm 2.2$                | $(4.23 \pm 0.01) \times 10^{14}$ | $23.42 \pm 0.72$      | $-3.46 \pm 0.05$ | $-24.09 \pm 0.50$ |                     |
| 5   | $0.14 \pm 0.03$   | $243.8 \pm 0.4$                | $(2.51 \pm 0.02) \times 10^{16}$ | $2.41 \pm 0.06$       | $0.60 \pm 0.05$  | $-2.08 \pm 0.13$  |                     |

<sup>a</sup> Determination coefficient of the nonlinear least-squares analysis of the KDA.<sup>b</sup>  $c_1 + c_2 + c_3$ .

## Supplementary Information

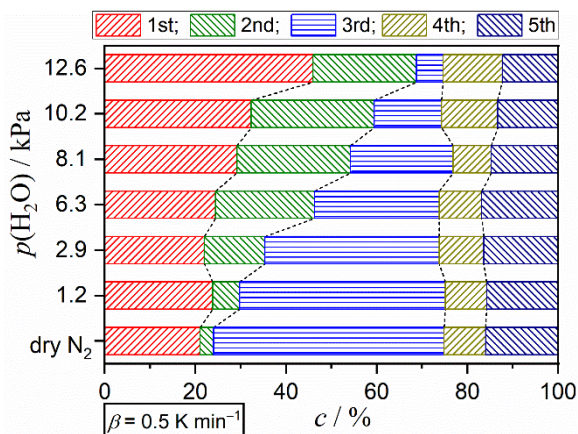

**Figure S55.** Variations in the contributions of component steps with  $p(\text{H}_2\text{O})$  value at a  $\beta$  of  $0.5 \text{ K min}^{-1}$ .

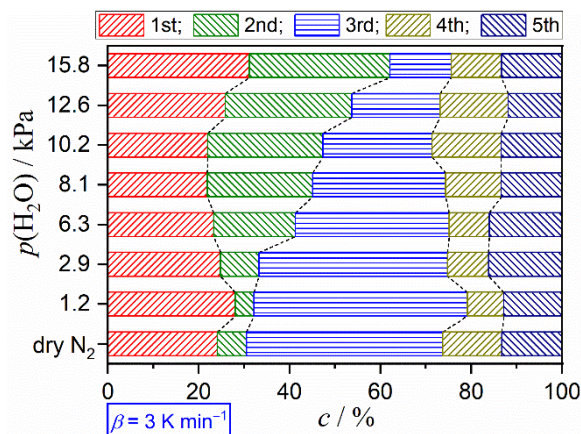

**Figure S58.** Variations in the contributions of component steps with  $p(\text{H}_2\text{O})$  value at a  $\beta$  of  $3 \text{ K min}^{-1}$ .

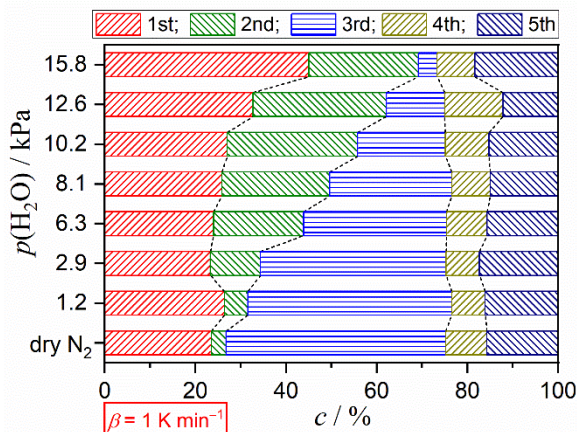

**Figure S56.** Variations in the contributions of component steps with  $p(\text{H}_2\text{O})$  value at a  $\beta$  of  $1 \text{ K min}^{-1}$ .

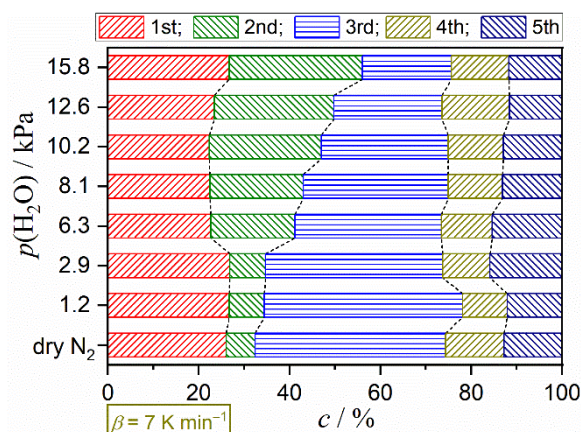

**Figure S59.** Variations in the contributions of component steps with  $p(\text{H}_2\text{O})$  value at a  $\beta$  of  $7 \text{ K min}^{-1}$ .

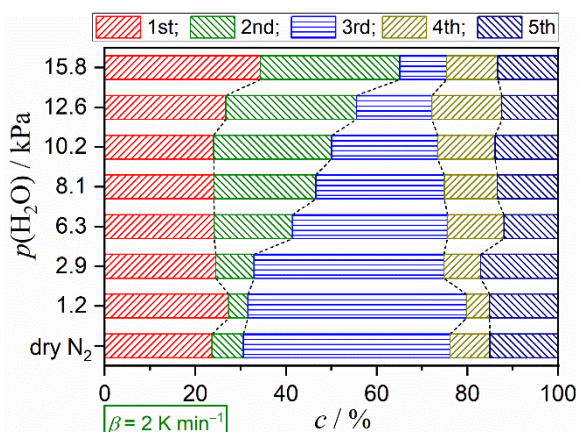

**Figure S57.** Variations in the contributions of component steps with  $p(\text{H}_2\text{O})$  value at a  $\beta$  of  $2 \text{ K min}^{-1}$ .

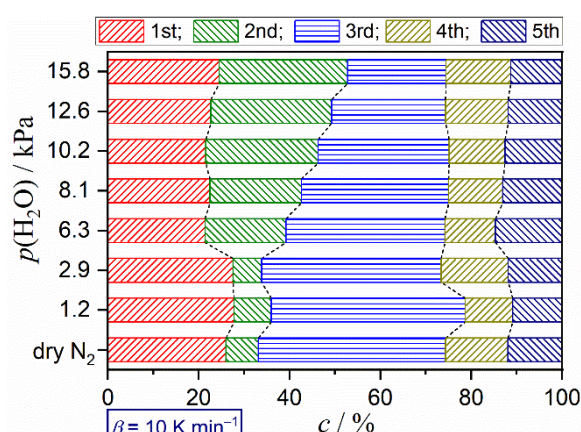

**Figure S60.** Variations in the contributions of component steps with  $p(\text{H}_2\text{O})$  value at a  $\beta$  of  $10 \text{ K min}^{-1}$ .

S5. Multistep Kinetics of the Thermal Dehydration of DCPA to form  $\gamma$ -CPP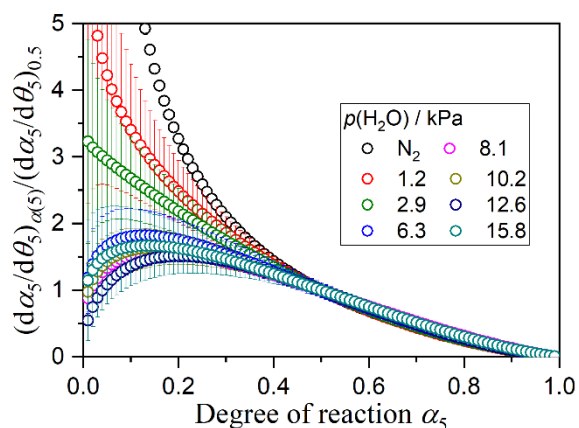

**Figure S61.** Normalized experimental master plots for the fifth mass loss step (the thermal dehydration of DCPA to form  $\gamma$ -CPP) at various atmospheric  $p(\text{H}_2\text{O})$  values.

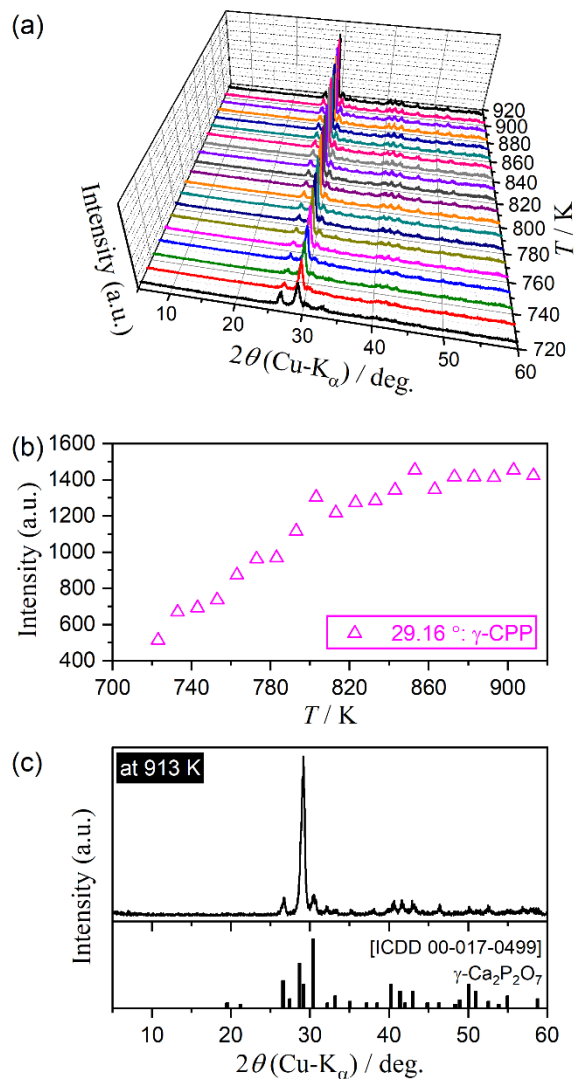

**Figure S62.** Change in the XRD pattern of DCPA during the stepwise isothermal heating in a stream of dry  $\text{N}_2$  gas: (a) XRD patterns at different temperatures, (b) changes in the peak intensity of  $\gamma$ -CPP ( $2\theta = 29.16^\circ$ ), and (c) XRD pattern at 913 K.
